# Supplementary material
Source: PubMed Central journal article supplement (PMC3601865)
Supplement: supp_blood-2008-02-140434_TableS01.pdf [file supp_blood-2008-02-140434_TableS01.pdf]

|                                                                     | CTD        | CVAD        | MP        | Total       |
|---------------------------------------------------------------------|------------|-------------|-----------|-------------|
| Number of patients                                                  | 984        | 557         | 425       | 1966        |
| Patients with a VTE⊗                                                | 148 (15%)  | 93 (16.7%)  | 15 (3.5%) | 256 (13%)   |
| Central line*                                                       | 1 (0.7%)   | 29 (31.18%) | 0 (0%)    | 30 (11.7%)  |
| DVT*                                                                | 57 (38.5%) | 31 (33.3%)  | 8 (53.3%) | 96 (37.5%)  |
| Pulmonary embolism*                                                 | 75 (50.7%) | 32 (34.4%)  | 4 (26.6%) | 111 (43.3%) |
| PE +DVT*                                                            | 10 (6.8%)  | 4 (4.3%)    | 0 (0%)    | 14 (5.4%)   |
| Other*                                                              | 19 (12.8%) | 18 (19.35%) | 3 (20 %)  | 4 (1.5%)    |
| Mean time to thromboembolic event (days)                            | 92.59      | 117.12      | 415.44    |             |
| ⊗( ) = percentage of patients<br>* ( ) = percentage of VTE patients |            |             |           |             |
