# Supplementary material
Source: PubMed Central journal article supplement (PMC3601865)
Supplement: supp_blood-2008-02-140434_TableS02.pdf [file supp_blood-2008-02-140434_TableS02.pdf]

Part 1

| SNP        | CHR | Minor allele | MAF cases | MAF controls | Major allele | CHISQ | P        | OR     | L95     | U95    | Emperical P-value | Number of permutations | Gene     | Functional Class                       |
|------------|-----|--------------|-----------|--------------|--------------|-------|----------|--------|---------|--------|-------------------|------------------------|----------|----------------------------------------|
| rs1051677  | 2   | C            | 0.045     | 0.1276       | T            | 10.03 | 0.001539 | 0.3221 | 0.1548  | 0.6703 | 0.001016          | 30504                  | XRCC5    | untranslated                           |
| rs6941     | 2   | A            | 0.045     | 0.1263       | C            | 9.808 | 0.001737 | 0.326  | 0.1567  | 0.6782 | 0.001161          | 26703                  | XRCC5    | untranslated                           |
| rs10473282 | 5   | A            | 0.4293    | 0.2947       | G            | 10.49 | 0.0012   | 1.8    | 1.259   | 2.574  | 0.001844          | 16813                  | GHR      | untranslated                           |
| rs3736265  | 4   | A            | 0.025     | 0.09585      | G            | 9.94  | 0.001617 | 0.2419 | 0.09352 | 0.6255 | 0.002531          | 12246                  | PPARGC1A | coding-nonsynon                        |
| rs582054   | 3   | A            | 0.5152    | 0.3947       | T            | 7.676 | 0.005597 | 1.629  | 1.152   | 2.304  | 0.003454          | 8685                   | IL12A    | intron                                 |
| rs10018284 | 4   | C            | 0.245     | 0.3634       | T            | 8.459 | 0.003632 | 0.5685 | 0.3876  | 0.8337 | 0.003516          | 8532                   | n/a      | n/a                                    |
| rs348457   | 9   | G            | 0.5202    | 0.3918       | C            | 8.8   | 0.003012 | 1.683  | 1.192   | 2.378  | 0.003707          | 8091                   | ALDH1A1  | intron,TagSNP:ALDH1A1                  |
| rs610529   | 9   | C            | 0.5255    | 0.3974       | T            | 8.613 | 0.003338 | 1.68   | 1.186   | 2.378  | 0.004014          | 7472                   | ALDH1A1  | intron,TagSNP:ALDH1A1                  |
| rs582537   | 3   | A            | 0.515     | 0.3995       | C            | 7.151 | 0.007491 | 1.596  | 1.132   | 2.251  | 0.00488           | 6146                   | IL12A    | intron                                 |
| rs2161811  | 9   | A            | 0.565     | 0.445        | G            | 7.564 | 0.005956 | 1.62   | 1.147   | 2.287  | 0.005649          | 5310                   | ALDH1A1  | intron,TagSNP:ALDH1A1                  |
| rs4647201  | 3   | A            | 0.03571   | 0.005263     | C            | 7.795 | 0.005238 | 7      | 1.44    | 34.02  | 0.005999          | 5000                   | EPM2AIP1 | coding-nonsynon                        |
| rs2227314  | 3   | G            | 0.5101    | 0.3979       | T            | 6.675 | 0.009779 | 1.576  | 1.115   | 2.227  | 0.006159          | 4870                   | IL12A    | intron                                 |
| rs1049216  | 4   | C            | 0.19      | 0.2891       | T            | 6.791 | 0.009163 | 0.5769 | 0.3804  | 0.875  | 0.006308          | 4755                   | CASP3    | untranslated                           |
| rs348458   | 9   | A            | 0.5051    | 0.3822       | G            | 8.012 | 0.004646 | 1.65   | 1.165   | 2.336  | 0.007133          | 4205                   | ALDH1A1  | intron,TagSNP:ALDH1A1                  |
| rs2267669  | 6   | G            | 0.1198    | 0.2139       | A            | 7.549 | 0.006006 | 0.5001 | 0.3031  | 0.8253 | 0.007158          | 4190                   | PPARD    | intron                                 |
| rs8191613  | 8   | A            | 0         | 0.03109      | G            | 6.348 | 0.01175  | n/a    | n/a     | n/a    | 0.007977          | 3760                   | NEIL2    | coding-nonsynon                        |
| rs1805405  | 1   | A            | 0.09596   | 0.1727       | C            | 6.162 | 0.01305  | 0.5085 | 0.296   | 0.8738 | 0.008212          | 3652                   | PARP1    | intron                                 |
| rs10516782 | 4   | G            | 0.1134    | 0.2042       | A            | 7.391 | 0.006554 | 0.4985 | 0.2997  | 0.8291 | 0.008549          | 3508                   | PTPN13   | coding-nonsynon                        |
| rs1799999  | 7   | T            | 0.06      | 0.1289       | G            | 6.635 | 0.009997 | 0.4315 | 0.2242  | 0.8305 | 0.009904          | 3028                   | PPP1R3A  | coding-nonsynon                        |
| rs8187915  | 9   | C            | 0.565     | 0.451        | T            | 6.86  | 0.008817 | 1.581  | 1.121   | 2.229  | 0.01003           | 2991                   | ALDH1A1  | coding-synon                           |
| rs2288087  | 9   | A            | 0.5619    | 0.4465       | T            | 6.802 | 0.009106 | 1.59   | 1.121   | 2.254  | 0.01003           | 2991                   | ALDH1A1  | intron,TagSNP:ALDH1A1                  |
| rs2839686  | 10  | T            | 0.23      | 0.3351       | C            | 6.944 | 0.008408 | 0.5928 | 0.401   | 0.8765 | 0.01014           | 2958                   | CXCL12   | locus                                  |
| rs13815    | 22  | C            | 0.2576    | 0.3679       | G            | 7.196 | 0.007307 | 0.5961 | 0.4078  | 0.8716 | 0.01017           | 2949                   | MT       | coding-nonsynon                        |
| rs12922317 | 16  | G            | 0.29      | 0.3958       | A            | 6.396 | 0.01144  | 0.6234 | 0.4317  | 0.9004 | 0.01028           | 2916                   | TNFRSF17 | intron,TagSNP:TNFRSF17(BCMA)           |
| rs2303317  | 9   | G            | 0.5657    | 0.4524       | T            | 6.671 | 0.009799 | 1.576  | 1.115   | 2.229  | 0.01053           | 2847                   | ALDH1A1  | intron,TagSNP:ALDH1A1                  |
| rs2267668  | 6   | G            | 0.125     | 0.2088       | A            | 6.266 | 0.01231  | 0.5414 | 0.3333  | 0.8797 | 0.01201           | 2496                   | PPARD    | intron                                 |
| rs3828942  | 7   | A            | 0.38      | 0.4844       | G            | 5.792 | 0.0161   | 0.6524 | 0.4604  | 0.9246 | 0.01248           | 2403                   | LEP      | intron                                 |
| rs3821107  | 2   | G            | 0.1717    | 0.2634       | A            | 6.109 | 0.01345  | 0.5796 | 0.375   | 0.8959 | 0.01351           | 2220                   | XRCC5    | intron,TagSNP:XRCC5(KU80)              |
| rs207928   | 2   | A            | 0.4697    | 0.3698       | G            | 5.416 | 0.01995  | 1.509  | 1.066   | 2.137  | 0.01365           | 2196                   | XRCC5    | intron,TagSNP:XRCC5(KU80)              |
| rs207932   | 2   | T            | 0.475     | 0.3776       | C            | 5.153 | 0.0232   | 1.491  | 1.055   | 2.107  | 0.01365           | 2196                   | XRCC5    | intron,TagSNP:XRCC5(KU80)              |
| rs2048426  | 1   | T            | 0.2398    | 0.3376       | C            | 5.882 | 0.0153   | 0.6188 | 0.4192  | 0.9136 | 0.01609           | 1864                   | PARP1    | intron                                 |
| rs1002153  | 1   | C            | 0.1       | 0.1727       | T            | 5.53  | 0.01869  | 0.5323 | 0.3128  | 0.906  | 0.01642           | 1826                   | PARP1    | intron                                 |
| rs4633     | 22  | C            | 0.415     | 0.5207       | T            | 5.896 | 0.01518  | 0.6529 | 0.4624  | 0.9219 | 0.01646           | 1822                   | COMT     | coding-synon                           |
| rs20579    | 19  | T            | 0.065     | 0.1263       | C            | 5.256 | 0.02188  | 0.481  | 0.2544  | 0.9094 | 0.01666           | 1800                   | LIG1     | untranslated                           |
| rs743534   | 10  | G            | 0.075     | 0.1414       | T            | 5.532 | 0.01867  | 0.4925 | 0.2704  | 0.8972 | 0.01679           | 1786                   | CYP2E1   | intron,TagSNP:CYP2E1                   |
| rs6028     | 1   | C            | 0.3737    | 0.2742       | T            | 5.999 | 0.01431  | 1.58   | 1.094   | 2.28   | 0.01694           | 1770                   | F5       | coding-synon                           |
| rs2028373  | 12  | G            | 0.2778    | 0.3816       | A            | 6.198 | 0.01279  | 0.6233 | 0.429   | 0.9057 | 0.01704           | 1760                   | AICDA    | coding-synon                           |
| rs3774968  | 4   | A            | 0.355     | 0.4581       | G            | 5.72  | 0.01677  | 0.651  | 0.4575  | 0.9263 | 0.01757           | 1706                   | NFKB1    | intron                                 |
| rs7778377  | 7   | T            | 0.15      | 0.2306       | C            | 5.284 | 0.02152  | 0.5889 | 0.3737  | 0.9279 | 0.0191            | 1570                   | STARD3NL | intron                                 |
| rs16879334 | 5   | G            | 0         | 0.02835      | C            | 5.778 | 0.01623  | n/a    | n/a     | n/a    | 0.02117           | 1416                   | MTRR     | coding-nonsynon                        |
| rs2193831  | 2   | G            | 0.3485    | 0.4378       | A            | 4.268 | 0.03884  | 0.6868 | 0.4805  | 0.9817 | 0.02179           | 1376                   | ABCB11   | intron,TagSNP:ABCB11                   |
| rs722921   | 9   | T            | 0.5606    | 0.4562       | A            | 5.719 | 0.01678  | 1.521  | 1.078   | 2.146  | 0.02185           | 1372                   | ALDH1A1  | intron,TagSNP:ALDH1A1                  |
| rs2082382  | 5   | G            | 0.5       | 0.4021       | A            | 5.149 | 0.02325  | 1.487  | 1.055   | 2.097  | 0.02208           | 1358                   | ADRB2    | Promoter                               |
| rs12022378 | 1   | T            | 0.2323    | 0.1536       | C            | 5.469 | 0.01936  | 1.667  | 1.083   | 2.565  | 0.02261           | 1326                   | DCLRE1B  | coding-nonsynon                        |
| rs2515641  | 10  | T            | 0.08163   | 0.1495       | C            | 5.418 | 0.01993  | 0.5057 | 0.2825  | 0.9055 | 0.02261           | 1326                   | CYP2E1   | coding-synon,TagSNP:CYP2E1             |
| rs8191664  | 8   | T            | 0         | 0.02332      | G            | 4.689 | 0.03036  | n/a    | n/a     | n/a    | 0.02278           | 1316                   | NEIL2    | coding-nonsynon                        |
| rs3130618  | 6   | A            | 0.148     | 0.2266       | C            | 5.011 | 0.02519  | 0.5928 | 0.3738  | 0.94   | 0.02375           | 1262                   | BAT4     | coding-nonsynon                        |
| rs2410558  | 8   | T            | 0.215     | 0.3032       | C            | 5.121 | 0.02363  | 0.6295 | 0.4208  | 0.9416 | 0.02383           | 1258                   | NAT2     | locus, TagSNP:NAT2                     |
| rs527221   | 19  | C            | 0.06122   | 0.1263       | G            | 5.871 | 0.01539  | 0.4511 | 0.2337  | 0.8708 | 0.02394           | 1252                   | DMPK     | coding-nonsynon                        |
| rs1411425  | 9   | T            | 0.0567    | 0.01579      | G            | 7.48  | 0.00624  | 3.747  | 1.364   | 10.29  | 0.02402           | 1248                   | ALDH1A1  | intron,TagSNP:ALDH1A1                  |
| rs2070677  | 10  | T            | 0.07576   | 0.1425       | A            | 5.524 | 0.01876  | 0.4933 | 0.2711  | 0.8977 | 0.02425           | 1236                   | CYP2E1   | intron,TagSNP:CYP2E1                   |
| rs4986894  | 10  | C            | 0.095     | 0.1658       | T            | 5.432 | 0.01977  | 0.5281 | 0.3067  | 0.9094 | 0.02506           | 1196                   | CYP2C19  | locus                                  |
| rs1042194  | 10  | T            | 0.1       | 0.1693       | G            | 5.074 | 0.02429  | 0.5453 | 0.3199  | 0.9296 | 0.02506           | 1196                   | CYP2C18  | untranslated,TagSNP:CYP2C18_19_cluster |

## Part 2

| SNP        | CHR | Minor allele | MAF cases | MAF controls | Major allele | CHISQ | P       | OR     | L95    | U95    | Empirical P-value | Number of permutations | Gene      | Functional Class               |
|------------|-----|--------------|-----------|--------------|--------------|-------|---------|--------|--------|--------|-------------------|------------------------|-----------|--------------------------------|
| rs17112809 | 10  | T            | 0.025     | 0.002604     | C            | 6.487 | 0.01087 | 9.821  | 1.139  | 84.64  | 0.02558           | 1172                   | MMS19L    | coding-nonsynon                |
| rs4244285  | 10  | A            | 0.09596   | 0.1675       | G            | 5.468 | 0.01937 | 0.5275 | 0.3065 | 0.9077 | 0.02566           | 1168                   | CYP2C19   | coding-synon                   |
| rs10249476 | 7   | T            | 0.405     | 0.3115       | G            | 5.086 | 0.02412 | 1.504  | 1.054  | 2.147  | 0.02634           | 1138                   | LEP       | Promoter                       |
| rs956868   | 12  | A            | 0.08081   | 0.1492       | C            | 5.547 | 0.01852 | 0.5013 | 0.2797 | 0.8983 | 0.02639           | 1136                   | WNK1      | coding-nonsynon                |
| rs4129472  | 5   | G            | 0.148     | 0.2326       | A            | 5.687 | 0.01709 | 0.5729 | 0.3611 | 0.9088 | 0.02643           | 1134                   | GHR       | intron                         |
| rs3731258  | 7   | T            | 0         | 0.03158      | A            | 5.937 | 0.01483 | n/a    | n/a    | n/a    | 0.02775           | 1080                   | CDK6      | locus                          |
| rs230521   | 4   | G            | 0.46      | 0.3627       | C            | 5.216 | 0.02239 | 1.497  | 1.058  | 2.118  | 0.02828           | 1060                   | NFKB1     | intron                         |
| rs5882     | 16  | G            | 0.25      | 0.3378       | A            | 4.577 | 0.0324  | 0.6533 | 0.4418 | 0.9662 | 0.02871           | 1044                   | CETP      | coding-nonsynon                |
| rs17572019 | 5   | A            | 0.06111   | 0.1278       | G            | 5.631 | 0.01765 | 0.444  | 0.2237 | 0.8813 | 0.02887           | 1038                   | PPARGC1B  | coding-nonsynon                |
| rs2070682  | 7   | C            | 0.365     | 0.4562       | T            | 4.49  | 0.0341  | 0.6852 | 0.4827 | 0.9728 | 0.02927           | 1024                   | SERPINE1  | intron                         |
| rs2470144  | 15  | A            | 0.5404    | 0.4471       | G            | 4.534 | 0.03324 | 1.454  | 1.03   | 2.054  | 0.02938           | 1020                   | CYP19A1   | intron                         |
| rs2281891  | 10  | A            | 0.095     | 0.1605       | G            | 4.732 | 0.02961 | 0.549  | 0.3179 | 0.9479 | 0.02967           | 1010                   | CYP2C18   | coding-nonsynon                |
| rs4151060  | 10  | T            | 0.1       | 0.04922      | G            | 5.468 | 0.01937 | 2.146  | 1.117  | 4.122  | 0.02979           | 1006                   | BTRC      | coding-nonsynon                |
| rs1027970  | 23  | C            | 0.2039    | 0.1196       | T            | 5.488 | 0.01915 | 1.887  | 1.103  | 3.226  | 0.03115           | 962                    | Admixture | Admixture                      |
| rs679899   | 2   | A            | 0.3939    | 0.4895       | G            | 4.788 | 0.02866 | 0.678  | 0.4783 | 0.961  | 0.03308           | 906                    | APOB      | coding-nonsynon                |
| rs2302524  | 19  | C            | 0.234     | 0.1603       | T            | 4.48  | 0.03429 | 1.6    | 1.033  | 2.479  | 0.03308           | 906                    | PLAUR     | coding-nonsynon                |
| rs207921   | 2   | G            | 0.475     | 0.3856       | A            | 4.289 | 0.03835 | 1.441  | 1.019  | 2.039  | 0.03308           | 906                    | XRCC5     | intron,TagSNP:XRCC5(KU80)      |
| rs1042714  | 5   | G            | 0.4949    | 0.4031       | C            | 4.473 | 0.03443 | 1.451  | 1.027  | 2.05   | 0.03311           | 905                    | ADRB2     | coding-nonsynon                |
| rs1805414  | 1   | C            | 0.25      | 0.3376       | T            | 4.756 | 0.02919 | 0.6539 | 0.4459 | 0.9592 | 0.03326           | 901                    | PARP1     | coding-synon                   |
| rs491061   | 19  | G            | 0         | 0.02162      | A            | 4.255 | 0.03914 | n/a    | n/a    | n/a    | 0.03344           | 896                    | CD244     | intron                         |
| rs3774932  | 4   | A            | 0.385     | 0.4845       | G            | 5.281 | 0.02155 | 0.666  | 0.4705 | 0.9427 | 0.0348            | 861                    | NFKB1     | intron                         |
| rs4253211  | 10  | C            | 0.1616    | 0.09896      | G            | 4.847 | 0.02769 | 1.755  | 1.059  | 2.909  | 0.03484           | 860                    | ERCC6     | coding-nonsynon                |
| rs11862958 | 16  | T            | 0.43      | 0.3325       | C            | 5.412 | 0.02    | 1.515  | 1.067  | 2.151  | 0.03509           | 854                    | TNFRSF17  | locus,TagSNP:TNFRSF17(BCMA)    |
| rs7011     | 14  | T            | 0.3081    | 0.2266       | C            | 4.578 | 0.03238 | 1.52   | 1.034  | 2.233  | 0.0361            | 830                    | CINP      | coding-nonsynon                |
| rs8679     | 1   | C            | 0.295     | 0.2139       | T            | 4.737 | 0.02953 | 1.538  | 1.042  | 2.269  | 0.03699           | 810                    | PARP1     | untranslated                   |
| rs216902   | 12  | A            | 0.3081    | 0.4043       | G            | 5.14  | 0.02338 | 0.6562 | 0.4554 | 0.9455 | 0.03713           | 807                    | VWF       | coding-synon                   |
| rs747657   | 1   | G            | 0.245     | 0.3351       | C            | 5.054 | 0.02457 | 0.644  | 0.4382 | 0.9465 | 0.03786           | 765                    | PARP1     | intron                         |
| rs488133   | 6   | T            | 0.3838    | 0.2995       | C            | 4.217 | 0.04003 | 1.457  | 1.016  | 2.089  | 0.03793           | 790                    | ESR1      | Promoter                       |
| rs578430   | 9   | T            | 0.06061   | 0.02577      | G            | 4.402 | 0.03589 | 2.439  | 1.035  | 5.748  | 0.03856           | 751                    | MUSK      | coding-nonsynon                |
| rs2076167  | 6   | G            | 0.1927    | 0.2732       | A            | 4.407 | 0.03578 | 0.635  | 0.4147 | 0.9722 | 0.03903           | 742                    | PPARD     | coding-synon                   |
| rs739485   | 23  | T            | 0.2745    | 0.1871       | C            | 4.427 | 0.03538 | 1.644  | 1.032  | 2.62   | 0.03978           | 728                    | WWC3      | intron,Admixture               |
| rs2242578  | 12  | G            | 0.2979    | 0.3984       | C            | 5.406 | 0.02007 | 0.6408 | 0.4397 | 0.9337 | 0.03989           | 726                    | GLI1      | locus                          |
| rs1709182  | 6   | C            | 0.2895    | 0.3743       | T            | 4.038 | 0.04448 | 0.6809 | 0.4676 | 0.9915 | 0.04              | 724                    | ESR1      | intron                         |
| rs1801249  | 13  | T            | 0.5213    | 0.4317       | C            | 4.01  | 0.04523 | 1.433  | 1.007  | 2.04   | 0.04033           | 718                    | ATP7B     | coding-nonsynon                |
| rs7732671  | 5   | C            | 0.075     | 0.1392       | G            | 5.248 | 0.02198 | 0.5015 | 0.2753 | 0.9134 | 0.04056           | 714                    | PPARGC1B  | coding-nonsynon                |
| rs2302387  | 7   | A            | 0.085     | 0.1432       | G            | 4.125 | 0.04225 | 0.5557 | 0.3133 | 0.9857 | 0.04113           | 704                    | ABCB4     | coding-synon                   |
| rs299295   | 5   | T            | 0.28      | 0.1979       | C            | 5.065 | 0.02441 | 1.576  | 1.059  | 2.346  | 0.04119           | 703                    | HMMR      | coding-nonsynon                |
| rs882709   | 9   | G            | 0.035     | 0.07772      | C            | 4.065 | 0.04379 | 0.4304 | 0.1856 | 0.9981 | 0.04119           | 703                    | SETX      | coding-nonsynon                |
| rs2140516  | 7   | C            | 0.3586    | 0.2708       | T            | 4.784 | 0.02872 | 1.505  | 1.042  | 2.173  | 0.04125           | 702                    | SLC13A1   | coding-nonsynon                |
| rs2237580  | 7   | G            | 0.1222    | 0.07065      | T            | 4.022 | 0.0449  | 1.832  | 1.007  | 3.331  | 0.04149           | 698                    | PON1      | intron,TagSNP:PON1             |
| rs1801132  | 6   | G            | 0.275     | 0.1933       | C            | 5.115 | 0.02371 | 1.583  | 1.061  | 2.361  | 0.04246           | 682                    | ESR1      | coding-synon                   |
| rs1341160  | 10  | A            | 0.075     | 0.1347       | T            | 4.639 | 0.03125 | 0.5208 | 0.2853 | 0.9507 | 0.04296           | 674                    | CYP2C9    | intron,TagSNP:CYP2C9_8_cluster |
| rs7709790  | 5   | G            | 0.1616    | 0.2345       | C            | 4.203 | 0.04034 | 0.6292 | 0.403  | 0.9821 | 0.04328           | 669                    | GHR       | intron                         |
| rs1788817  | 18  | G            | 0.4293    | 0.5212       | A            | 4.389 | 0.03618 | 0.6911 | 0.4888 | 0.9771 | 0.04348           | 666                    | C18orf8   | intron                         |
| rs506504   | 11  | T            | 0.06633   | 0.02865      | C            | 4.645 | 0.03115 | 2.409  | 1.059  | 5.481  | 0.04414           | 656                    | CHEK1     | coding-nonsynon                |
| rs3789452  | 1   | A            | 0.37      | 0.2891       | T            | 3.98  | 0.04603 | 1.444  | 1.006  | 2.075  | 0.04489           | 645                    | ABCA4     | locus                          |
| rs502570   | 2   | T            | 0.4082    | 0.3194       | C            | 4.492 | 0.03405 | 1.47   | 1.029  | 2.1    | 0.04503           | 643                    | ABCB11    | locus,TagSNP:ABCB11            |
| rs17110453 | 10  | C            | 0.08586   | 0.1447       | A            | 4.138 | 0.04193 | 0.555  | 0.3128 | 0.9848 | 0.04531           | 639                    | CYP2C8    | locus                          |
| rs7751481  | 6   | A            | 0.195     | 0.2784       | G            | 4.89  | 0.02701 | 0.628  | 0.415  | 0.9504 | 0.04553           | 636                    | PPARD     | intron                         |
| rs520354   | 2   | G            | 0.4133    | 0.5          | A            | 3.925 | 0.04757 | 0.7043 | 0.4977 | 0.9969 | 0.04603           | 629                    | APOB      | intron                         |
| rs2108622  | 19  | T            | 0.0731    | 0.2345       | C            | 3.904 | 0.04816 | 1.466  | 1.002  | 2.146  | 0.04685           | 618                    | CYP4F2    | coding-nonsynon                |
| rs216321   | 12  | T            | 0.07732   | 0.1383       | C            | 4.587 | 0.03221 | 0.5221 | 0.2858 | 0.954  | 0.04723           | 613                    | VWF       | coding-nonsynon                |
| rs552976   | 2   | T            | 0.405     | 0.3203       | C            | 4.15  | 0.04165 | 1.444  | 1.013  | 2.059  | 0.04739           | 611                    | ABCB11    | intron,TagSNP:ABCB11           |
| rs9862     | 22  | T            | 0.425     | 0.5129       | C            | 4.082 | 0.04334 | 0.702  | 0.4977 | 0.9901 | 0.04817           | 601                    | TIMP3     | coding-synon                   |
| rs9890721  | 17  | C            | 0.5       | 0.4136       | T            | 3.944 | 0.04704 | 1.418  | 1.004  | 2.002  | 0.04833           | 599                    | MYCBPAP   | coding-nonsynon                |
| rs508506   | 2   | T            | 0.4394    | 0.3474       | G            | 4.684 | 0.03044 | 1.473  | 1.036  | 2.092  | 0.04866           | 595                    | ABCB11    | intron,TagSNP:ABCB11           |
| rs3731055  | 3   | A            | 0.02525   | 0.005291     | G            | 4.313 | 0.03783 | 4.87   | 0.9363 | 25.33  | 0.04899           | 591                    | XPC       | locus,intron                   |
| rs3219090  | 1   | A            | 0.245     | 0.3237       | G            | 3.889 | 0.04861 | 0.678  | 0.4603 | 0.9988 | 0.04983           | 581                    | PARP1     | intron                         |
