# Supplementary material
Source: PubMed Central journal article supplement (PMC3601865)
Supplement: supp_blood-2008-02-140434_TableS03.pdf [file supp_blood-2008-02-140434_TableS03.pdf]

## Part 1

| SNP        | CHR | TEST  | Genotype/alleles<br>in cases | Genotype/alleles<br>in controls | CHISQ | DF | P        | Emperical<br>p-value | Number of<br>Permutations | Gene      | Functional Class                       |
|------------|-----|-------|------------------------------|---------------------------------|-------|----|----------|----------------------|---------------------------|-----------|----------------------------------------|
| rs1051677  | 2   | TREND | 9/191                        | 49/335                          | 10.38 | 1  | 0.001273 | 0.001157             | 26784                     | XRCC5     | untranslated                           |
| rs6941     | 2   | TREND | 9/191                        | 49/339                          | 10.14 | 1  | 0.001449 | 0.001343             | 23088                     | XRCC5     | untranslated                           |
| rs3736265  | 4   | TREND | 5/195                        | 37/349                          | 9.233 | 1  | 0.002378 | 0.003168             | 9470                      | PPARGC1A  | coding-nonsynon                        |
| rs10473282 | 5   | TREND | 85/113                       | 112/268                         | 9.821 | 1  | 0.001726 | 0.003703             | 8100                      | GHR       | untranslated                           |
| rs2267669  | 6   | TREND | 23/169                       | 80/294                          | 7.616 | 1  | 0.005786 | 0.004988             | 6013                      | PPARD     | intron                                 |
| rs4647201  | 3   | TREND | 7/189                        | 2/378                           | 7.921 | 1  | 0.004886 | 0.006308             | 4755                      | EPM2AIP1  | coding-nonsynon                        |
| rs348457   | 9   | TREND | 103/95                       | 152/236                         | 8.619 | 1  | 0.003328 | 0.00668              | 4490                      | ALDH1A1   | intron,TagSNP:ALDH1A1                  |
| rs1799999  | 7   | TREND | 12/188                       | 50/338                          | 6.954 | 1  | 0.008365 | 0.006801             | 4410                      | PPP1R3A   | coding-nonsynon                        |
| rs207928   | 2   | DOM   | 78/21                        | 120/72                          | 7.969 | 1  | 0.004758 | 0.007074             | 4240                      | XRCC5     | intron,TagSNP:XRCC5(KU80)              |
| rs610529   | 9   | TREND | 103/93                       | 151/229                         | 8.494 | 1  | 0.003564 | 0.007175             | 4180                      | ALDH1A1   | intron,TagSNP:ALDH1A1                  |
| rs8191613  | 8   | TREND | 0/200                        | 12/374                          | 6.483 | 1  | 0.01089  | 0.007746             | 3872                      | NEIL2     | coding-nonsynon                        |
| rs207932   | 2   | DOM   | 79/21                        | 121/71                          | 7.78  | 1  | 0.005283 | 0.008979             | 3340                      | XRCC5     | intron,TagSNP:XRCC5(KU80)              |
| rs10516782 | 4   | TREND | 22/172                       | 78/304                          | 6.998 | 1  | 0.008158 | 0.009177             | 3268                      | PTPN13    | coding-nonsynon                        |
| rs2267668  | 6   | TREND | 25/175                       | 81/307                          | 6.498 | 1  | 0.0108   | 0.009917             | 3024                      | PPARD     | intron                                 |
| rs10018284 | 4   | TREND | 49/151                       | 141/247                         | 8.688 | 1  | 0.003202 | 0.01123              | 2670                      | n/a       | n/a                                    |
| rs1805405  | 1   | TREND | 19/179                       | 67/321                          | 6.577 | 1  | 0.01033  | 0.01168              | 2568                      | PARP1     | intron                                 |
| rs348458   | 9   | TREND | 99/97                        | 146/236                         | 7.784 | 1  | 0.005272 | 0.01175              | 2553                      | ALDH1A1   | intron,TagSNP:ALDH1A1                  |
| rs20579    | 19  | TREND | 13/187                       | 49/339                          | 5.724 | 1  | 0.01674  | 0.01298              | 2310                      | LIG1      | untranslated                           |
| rs582537   | 3   | TREND | 103/97                       | 155/233                         | 8.245 | 1  | 0.004087 | 0.01342              | 2235                      | IL12A     | intron                                 |
| rs13815    | 22  | DOM   | 42/57                        | 115/78                          | 7.752 | 1  | 0.005364 | 0.01373              | 2184                      | MT        | coding-nonsynon                        |
| rs1027970  | 23  | TREND | 24/82                        | 19/151                          | 5.694 | 1  | 0.01703  | 0.01377              | 2178                      | Admixture | Admixture                              |
| rs956868   | 12  | TREND | 16/182                       | 57/325                          | 5.477 | 1  | 0.01927  | 0.01381              | 2172                      | WNK1      | coding-nonsynon                        |
| rs207921   | 2   | DOM   | 79/21                        | 121/67                          | 6.592 | 1  | 0.01024  | 0.01555              | 1928                      | XRCC5     | intron,TagSNP:XRCC5(KU80)              |
| rs2161811  | 9   | TREND | 113/87                       | 170/212                         | 7.543 | 1  | 0.006023 | 0.01578              | 1900                      | ALDH1A1   | intron,TagSNP:ALDH1A1                  |
| rs582054   | 3   | TREND | 102/96                       | 150/230                         | 8.923 | 1  | 0.002816 | 0.01588              | 1888                      | IL12A     | intron                                 |
| rs12022378 | 1   | TREND | 46/152                       | 59/325                          | 5.53  | 1  | 0.0187   | 0.01588              | 1888                      | DCLRE1B   | coding-nonsynon                        |
| rs207927   | 2   | DOM   | 77/18                        | 121/63                          | 7.111 | 1  | 0.007663 | 0.01638              | 1830                      | XRCC5     | intron,TagSNP:XRCC5(KU80)              |
| rs1049216  | 4   | TREND | 38/162                       | 111/273                         | 7.046 | 1  | 0.007946 | 0.01692              | 1772                      | CASP3     | untranslated                           |
| rs4244285  | 10  | TREND | 19/179                       | 65/323                          | 5.471 | 1  | 0.01933  | 0.01764              | 1700                      | CYP2C19   | coding-synon                           |
| rs4986894  | 10  | TREND | 19/181                       | 64/322                          | 5.569 | 1  | 0.01828  | 0.01824              | 1644                      | CYP2C19   | locus                                  |
| rs743534   | 10  | TREND | 15/185                       | 54/328                          | 5.548 | 1  | 0.0185   | 0.01924              | 1558                      | CYP2E1    | intron,TagSNP:CYP2E1                   |
| rs1411425  | 9   | TREND | 11/183                       | 6/374                           | 5.143 | 1  | 0.02334  | 0.01978              | 1516                      | ALDH1A1   | intron,TagSNP:ALDH1A1                  |
| rs8187915  | 9   | TREND | 113/87                       | 175/213                         | 6.91  | 1  | 0.008574 | 0.02114              | 1418                      | ALDH1A1   | coding-synon                           |
| rs1002153  | 1   | TREND | 20/180                       | 67/321                          | 5.919 | 1  | 0.01498  | 0.02132              | 1406                      | PARP1     | intron                                 |
| rs3130618  | 6   | TREND | 29/167                       | 87/297                          | 5.308 | 1  | 0.02122  | 0.02135              | 1404                      | BAT4      | coding-nonsynon                        |
| rs12922317 | 16  | DOM   | 49/51                        | 125/67                          | 7.082 | 1  | 0.007788 | 0.02141              | 1400                      | TNFRSF17  | intron,TagSNP:TNFRSF17(BCMA)           |
| rs2070677  | 10  | TREND | 15/183                       | 55/331                          | 5.383 | 1  | 0.02033  | 0.02172              | 1380                      | CYP2E1    | intron,TagSNP:CYP2E1                   |
| rs1042194  | 10  | TREND | 20/180                       | 65/319                          | 5.245 | 1  | 0.02201  | 0.02285              | 1312                      | CYP2C18   | untranslated,TagSNP:CYP2C18_19_cluster |
| rs17112809 | 10  | TREND | 5/195                        | 1/383                           | 6.555 | 1  | 0.01046  | 0.02309              | 1298                      | MMS19L    | coding-nonsynon                        |
| rs2839686  | 10  | TREND | 46/154                       | 130/258                         | 7.218 | 1  | 0.007216 | 0.0232               | 1292                      | CXCL12    | locus                                  |
| rs1801132  | 6   | DOM   | 48/52                        | 65/129                          | 5.859 | 1  | 0.0155   | 0.02324              | 1290                      | ESR1      | coding-synon                           |
| rs16879334 | 5   | TREND | 0/200                        | 11/377                          | 4.955 | 1  | 0.02602  | 0.02425              | 1236                      | MTRR      | coding-nonsynon                        |
| rs2515641  | 10  | TREND | 16/180                       | 58/330                          | 5.366 | 1  | 0.02053  | 0.0251               | 1194                      | CYP2E1    | coding-synonymous,TagSNP:CYP2E1        |
| rs2048426  | 1   | DOM   | 40/58                        | 108/86                          | 5.747 | 1  | 0.01651  | 0.02519              | 1190                      | PARP1     | intron                                 |
| rs2303317  | 9   | TREND | 112/86                       | 171/207                         | 6.627 | 1  | 0.01004  | 0.02566              | 1168                      | ALDH1A1   | intron,TagSNP:ALDH1A1                  |
| rs8191664  | 8   | TREND | 0/198                        | 9/377                           | 4.763 | 1  | 0.02907  | 0.02607              | 1188                      | NEIL2     | coding-nonsynon                        |
| rs2281891  | 10  | TREND | 19/181                       | 61/319                          | 4.949 | 1  | 0.0261   | 0.02715              | 1104                      | CYP2C18   | coding-nonsynon                        |
| rs2288087  | 9   | TREND | 109/85                       | 167/207                         | 7.108 | 1  | 0.007674 | 0.0273               | 1098                      | ALDH1A1   | intron,TagSNP:ALDH1A1                  |

## Part 2

| SNP        | CHR | TEST  | Genotype/alleles<br>in cases | Genotype/alleles<br>in controls | CHISQ | DF | P        | Emperical<br>p-value | Number of<br>Permutations | Gene     | Functional Class               |
|------------|-----|-------|------------------------------|---------------------------------|-------|----|----------|----------------------|---------------------------|----------|--------------------------------|
| rs4253211  | 10  | TREND | 32/166                       | 38/346                          | 4.726 | 1  | 0.02971  | 0.02822              | 1062                      | ERCC6    | coding-nonsynon                |
| rs1132776  | 3   | REC   | 26/74                        | 27/167                          | 6.519 | 1  | 0.01067  | 0.02915              | 1028                      | ABCC5    | coding-synon                   |
| rs6028     | 1   | TREND | 74/124                       | 102/270                         | 5.733 | 1  | 0.01665  | 0.02997              | 1000                      | F5       | coding-synon                   |
| rs2028373  | 12  | TREND | 55/143                       | 145/235                         | 5.979 | 1  | 0.01448  | 0.03                 | 999                       | AICDA    | coding-synon                   |
| rs2227314  | 3   | TREND | 101/97                       | 152/230                         | 7.661 | 1  | 0.005643 | 0.03006              | 997                       | IL12A    | intron                         |
| rs3828942  | 7   | REC   | 11/89                        | 45/147                          | 6.562 | 1  | 0.01042  | 0.0304               | 986                       | LEP      | intron                         |
| rs506504   | 11  | TREND | 13/183                       | 11/373                          | 4.854 | 1  | 0.02758  | 0.03055              | 981                       | CHEK1    | coding-nonsynon                |
| rs527221   | 19  | TREND | 12/184                       | 48/332                          | 5.686 | 1  | 0.0171   | 0.03119              | 961                       | DMPK     | coding-nonsynon                |
| rs7778377  | 7   | TREND | 30/170                       | 89/297                          | 5.408 | 1  | 0.02005  | 0.03125              | 959                       | STARD3NL | intron                         |
| rs3821107  | 2   | TREND | 34/164                       | 98/274                          | 5.692 | 1  | 0.01704  | 0.03128              | 958                       | XRCC5    | intron,TagSNP:XRCC5(KU80)      |
| rs9808232  | 2   | REC   | 30/68                        | 34/159                          | 6.398 | 1  | 0.01142  | 0.03145              | 953                       | ROCK2    | coding-nonsynon                |
| rs722921   | 9   | TREND | 111/87                       | 177/211                         | 5.702 | 1  | 0.01695  | 0.03191              | 939                       | ALDH1A1  | intron,TagSNP:ALDH1A1          |
| rs2242578  | 12  | REC   | 8/86                         | 37/145                          | 6.345 | 1  | 0.01177  | 0.03219              | 931                       | GLI1     | locus                          |
| rs3731258  | 7   | TREND | 0/184                        | 12/368                          | 5.169 | 1  | 0.02299  | 0.03236              | 926                       | CDK6     | locus                          |
| rs2302524  | 19  | TREND | 44/144                       | 59/309                          | 4.431 | 1  | 0.03528  | 0.03243              | 924                       | PLAUR    | coding-nonsynon                |
| rs299295   | 5   | DOM   | 49/51                        | 66/126                          | 5.891 | 1  | 0.01522  | 0.03521              | 851                       | HMMR     | coding-nonsynon                |
| rs3774968  | 4   | TREND | 71/129                       | 175/207                         | 5.562 | 1  | 0.01835  | 0.03542              | 846                       | NFKB1    | intron                         |
| rs1801249  | 13  | REC   | 25/69                        | 26/157                          | 6.344 | 1  | 0.01178  | 0.03571              | 839                       | ATP7B    | coding-nonsynon                |
| rs4681     | 4   | TREND | 23/177                       | 70/316                          | 4.276 | 1  | 0.03866  | 0.03593              | 834                       | FB       | coding-synon                   |
| rs747657   | 1   | DOM   | 41/59                        | 107/87                          | 5.288 | 1  | 0.02147  | 0.03597              | 833                       | PARP1    | intron                         |
| rs491061   | 19  | TREND | 0/194                        | 8/362                           | 4.317 | 1  | 0.03773  | 0.03742              | 774                       | CD244    | intron                         |
| rs1390358  | 8   | DOM   | 77/22                        | 123/71                          | 6.252 | 1  | 0.0124   | 0.03774              | 794                       | NAT2     | intron,TagSNP:NAT2             |
| rs10018287 | 4   | GENO  | 11/23/66                     | 13/76/105                       | 8.221 | 2  | 0.0164   | 0.03786              | 765                       | MGC48628 | intron                         |
| rs1805414  | 1   | DOM   | 42/58                        | 109/85                          | 5.315 | 1  | 0.02114  | 0.03836              | 755                       | PARP1    | coding-synon                   |
| rs1913474  | 6   | DOM   | 51/44                        | 75/113                          | 4.859 | 1  | 0.0275   | 0.03903              | 742                       | ESR1     | intron                         |
| rs17572019 | 5   | TREND | 11/169                       | 45/307                          | 4.847 | 1  | 0.0277   | 0.03919              | 739                       | PPARGC1B | coding-nonsynon                |
| rs2302387  | 7   | TREND | 17/183                       | 55/329                          | 4.053 | 1  | 0.04409  | 0.03919              | 739                       | ABCB4    | coding-synon                   |
| rs1866389  | 5   | DOM   | 46/54                        | 61/128                          | 5.283 | 1  | 0.02153  | 0.03924              | 738                       | THBS4    | coding-nonsynon                |
| rs521102   | 11  | GENO  | 19/58/23                     | 53/79/62                        | 7.924 | 2  | 0.01902  | 0.03956              | 732                       | CHEK1    | intron                         |
| rs11862958 | 16  | TREND | 86/114                       | 129/259                         | 4.928 | 1  | 0.02643  | 0.03978              | 728                       | TNFRSF17 | locus,TagSNP:TNFRSF17(BCMA)    |
| rs4633     | 22  | TREND | 83/117                       | 201/185                         | 6.221 | 1  | 0.01263  | 0.04085              | 709                       | COMT     | coding-synon                   |
| rs903247   | 12  | GENO  | 14/28/58                     | 21/86/84                        | 7.994 | 2  | 0.01837  | 0.0409               | 708                       | CHST11   | 3' UTR                         |
| rs4151060  | 10  | TREND | 20/180                       | 19/367                          | 5     | 1  | 0.02535  | 0.04125              | 702                       | BTRC     | coding-nonsynon                |
| rs753381   | 20  | REC   | 25/72                        | 28/157                          | 4.719 | 1  | 0.02984  | 0.04191              | 691                       | PLCG1    | coding-nonsynon                |
| rs3803036  | 12  | TREND | 36/164                       | 98/288                          | 4.184 | 1  | 0.0408   | 0.04348              | 666                       | PTPRR    | coding-nonsynon                |
| rs6095558  | 20  | DOM   | 34/63                        | 91/96                           | 4.802 | 1  | 0.02842  | 0.04354              | 665                       | PTGIS    | coding-synon                   |
| rs6056     | 4   | TREND | 23/175                       | 70/318                          | 3.99  | 1  | 0.04577  | 0.04354              | 665                       | FB       | coding-synon                   |
| rs732774   | 13  | REC   | 26/71                        | 28/161                          | 6.016 | 1  | 0.01418  | 0.04414              | 656                       | ATP7B    | coding-nonsynon                |
| rs230521   | 4   | TREND | 92/108                       | 140/246                         | 4.929 | 1  | 0.02641  | 0.04427              | 654                       | NFKB1    | intron                         |
| rs216902   | 12  | TREND | 61/137                       | 152/224                         | 4.957 | 1  | 0.02599  | 0.04618              | 627                       | VWF      | coding-synon                   |
| rs5882     | 16  | TREND | 48/144                       | 125/245                         | 4.961 | 1  | 0.02593  | 0.04633              | 625                       | CETP     | coding-nonsynon                |
| rs2582790  | 1   | GENO  | 6/53/41                      | 19/69/105                       | 8.223 | 2  | 0.01638  | 0.04647              | 623                       | HMGCS2   | Promoter                       |
| rs8679     | 1   | REC   | 11/89                        | 8/186                           | 5.161 | 1  | 0.02309  | 0.04655              | 622                       | PARP1    | untranslated                   |
| rs1341180  | 10  | TREND | 15/185                       | 52/334                          | 4.463 | 1  | 0.03463  | 0.04662              | 621                       | CYP2C9   | intron,TagSNP:CYP2C9_8_cluster |
| rs13332630 | 16  | TREND | 20/178                       | 21/357                          | 4.161 | 1  | 0.04136  | 0.0467               | 620                       | TNFRSF17 | locus,TagSNP:TNFRSF17(BCMA)    |
| rs2140516  | 7   | REC   | 16/83                        | 14/178                          | 5.558 | 1  | 0.0184   | 0.04762              | 608                       | SLC13A1  | coding-nonsynon                |
| rs993568   | 1   | DOM   | 61/36                        | 146/45                          | 5.846 | 1  | 0.01562  | 0.04785              | 605                       | DPYD     | intron,TagSNP:DPYD             |
| rs1044141  | 7   | TREND | 59/139                       | 87/297                          | 4.008 | 1  | 0.04528  | 0.04825              | 600                       | STK17A   | coding-nonsynon                |
| rs1514347  | 6   | DOM   | 49/49                        | 70/123                          | 5.07  | 1  | 0.02435  | 0.04841              | 598                       | ESR1     | intron                         |
| rs7732671  | 5   | TREND | 15/185                       | 54/334                          | 4.645 | 1  | 0.03115  | 0.04858              | 596                       | PPARGC1B | coding-nonsynon                |
| rs488133   | 6   | DOM   | 64/35                        | 97/95                           | 5.273 | 1  | 0.02166  | 0.04983              | 581                       | ESR1     | Promoter                       |
