# Supplementary material
Source: PubMed Central journal article supplement (PMC3601865)
Supplement: supp_blood-2008-02-140434_TableS04.pdf [file supp_blood-2008-02-140434_TableS04.pdf]

| SNP        | CHR | Minor allele | MAF cases | MAF controls | Major allele | CHISQ | P         | OR     | L95     | U95    | Empirical P-value | Number of permutations | Gene     | Functional Class                       |
|------------|-----|--------------|-----------|--------------|--------------|-------|-----------|--------|---------|--------|-------------------|------------------------|----------|----------------------------------------|
| rs2023410  | 8   | G            | 0.11      | 0.2589       | A            | 9.149 | 0.002489  | 0.3537 | 0.1767  | 0.7081 | 0.0007614         | 40713                  | ADRB3    | untranslated                           |
| rs3212948  | 19  | G            | 0.2143    | 0.4018       | C            | 10.61 | 0.001125  | 0.4061 | 0.2339  | 0.7049 | 0.0007801         | 38454                  | ERCC1    | intron                                 |
| rs4364327  | 4   | T            | 0.463     | 0.2563       | C            | 14.56 | 0.0001357 | 2.501  | 1.552   | 4.031  | 0.0009625         | 31168                  | UGT2B7   | intron                                 |
| rs11765552 | 7   | T            | 0.5833    | 0.395        | A            | 10.64 | 0.001109  | 2.145  | 1.351   | 3.406  | 0.003655          | 8208                   | LMTK2    | coding-nonsynon                        |
| rs4148217  | 2   | A            | 0.287     | 0.1513       | C            | 8.771 | 0.003061  | 2.259  | 1.307   | 3.905  | 0.004487          | 6685                   | ABCG8    | coding-nonsynon                        |
| rs17683288 | 8   | G            | 0.1226    | 0.04622      | T            | 6.6   | 0.0102    | 2.885  | 1.247   | 6.671  | 0.004777          | 6279                   | ARHGEF10 | coding-nonsynon                        |
| rs156641   | 19  | A            | 0.4712    | 0.3178       | G            | 7.328 | 0.006791  | 1.912  | 1.192   | 3.068  | 0.006748          | 4445                   | LIG1     | intron                                 |
| rs215106   | 16  | G            | 0.1944    | 0.09244      | A            | 7.103 | 0.007696  | 2.37   | 1.24    | 4.529  | 0.006951          | 4315                   | ABCC1    | intron,TagSNP:ABCC1                    |
| rs4839469  | 1   | A            | 0.06481   | 0.1624       | G            | 6.157 | 0.01309   | 0.3575 | 0.1542  | 0.829  | 0.007566          | 3964                   | VANGL1   | coding-nonsynon                        |
| rs2037483  | 7   | G            | 0.5566    | 0.4009       | A            | 7.131 | 0.007575  | 1.876  | 1.179   | 2.986  | 0.007901          | 3796                   | HUS1     | intron                                 |
| rs3731055  | 3   | A            | 0.03704   | 0            | G            | 8.918 | 0.002824  | n/a    | n/a     | n/a    | 0.007934          | 3780                   | XPC      | locus,intron                           |
| rs2292245  | 3   | A            | 0.2685    | 0.1429       | G            | 7.877 | 0.005007  | 2.203  | 1.259   | 3.854  | 0.008491          | 3532                   | PTPRG    | coding-nonsynon                        |
| rs2227869  | 13  | C            | 0.0566    | 0.01261      | G            | 5.572 | 0.01825   | 4.7    | 1.153   | 19.16  | 0.009044          | 3316                   | ERCC5    | coding-nonsynon                        |
| rs2305801  | 19  | A            | 0.1058    | 0.2257       | G            | 6.71  | 0.009587  | 0.4059 | 0.2019  | 0.816  | 0.0114            | 2631                   | CYP4F11  | coding-synon                           |
| rs6018     | 1   | G            | 0.1038    | 0.03043      | T            | 7.697 | 0.00553   | 3.689  | 1.388   | 9.805  | 0.01434           | 2091                   | F5       | coding-nonsynon                        |
| rs2582790  | 1   | T            | 0.4167    | 0.2739       | G            | 6.888 | 0.008678  | 1.893  | 1.172   | 3.06   | 0.0153            | 1894                   | HMGCS2   | Promoter                               |
| rs10895065 | 11  | A            | 0.4362    | 0.3063       | G            | 4.929 | 0.02641   | 1.752  | 1.065   | 2.882  | 0.01574           | 1842                   | PGR      | intron                                 |
| rs1056663  | 7   | G            | 0.5566    | 0.4138       | A            | 5.977 | 0.0145    | 1.778  | 1.118   | 2.828  | 0.0158            | 1834                   | HUS1     | coding-synon                           |
| rs1064796  | 19  | C            | 0.1574    | 0.2754       | G            | 5.684 | 0.01712   | 0.4915 | 0.2721  | 0.8878 | 0.01643           | 1764                   | CYP4F11  | coding-synon                           |
| rs215101   | 16  | C            | 0.213     | 0.1134       | G            | 5.951 | 0.01471   | 2.115  | 1.148   | 3.894  | 0.01855           | 1562                   | ABCC1    | intron,TagSNP:ABCC1                    |
| rs3795837  | 1   | C            | 0.2222    | 0.1186       | A            | 6.195 | 0.01281   | 2.122  | 1.163   | 3.872  | 0.01929           | 1502                   | ATF3     | intron                                 |
| rs1801275  | 16  | G            | 0.1204    | 0.2246       | A            | 5.189 | 0.02273   | 0.4725 | 0.2454  | 0.9099 | 0.02064           | 1404                   | IL4R     | coding-nonsynon                        |
| rs268      | 8   | G            | 0.05319   | 0.01364      | A            | 4.15  | 0.04163   | 4.064  | 0.9509  | 17.37  | 0.02106           | 1376                   | LPL      | coding-nonsynon                        |
| rs17572019 | 5   | A            | 0.03125   | 0.1036       | G            | 4.673 | 0.03064   | 0.2791 | 0.08174 | 0.953  | 0.02179           | 1330                   | PPARGC1B | coding-nonsynon                        |
| rs1047768  | 13  | T            | 0.4528    | 0.3034       | C            | 7.159 | 0.00746   | 1.9    | 1.184   | 3.05   | 0.02202           | 1316                   | ERCC5    | coding-synon                           |
| rs1024323  | 4   | A            | 0.2407    | 0.3675       | G            | 5.393 | 0.02022   | 0.5457 | 0.326   | 0.9132 | 0.02226           | 1302                   | GRK4     | coding-nonsynon                        |
| rs2725362  | 8   | T            | 0.3654    | 0.5          | G            | 5.214 | 0.0224    | 0.5758 | 0.3577  | 0.9269 | 0.02278           | 1272                   | WRN      | coding-nonsynon                        |
| rs7514102  | 1   | A            | 0.4717    | 0.3462       | G            | 4.855 | 0.02757   | 1.687  | 1.057   | 2.69   | 0.02489           | 1164                   | PROK1    | coding-nonsynon                        |
| rs801720   | 22  | T            | 0.2647    | 0.3966       | G            | 5.37  | 0.02048   | 0.5478 | 0.3281  | 0.9146 | 0.02506           | 1156                   | CERK     | coding-nonsynon                        |
| rs932477   | 6   | A            | 0.05556   | 0.1453       | G            | 5.762 | 0.01637   | 0.346  | 0.1407  | 0.8511 | 0.02668           | 1086                   | ESR1     | intron                                 |
| rs3813865  | 10  | C            | 0.0463    | 0.008403     | G            | 5.381 | 0.02035   | 5.728  | 1.093   | 30.01  | 0.02754           | 1052                   | CYP2E1   | locus,TagSNP:CYP2E1                    |
| rs1799977  | 3   | G            | 0.27      | 0.3947       | A            | 4.713 | 0.02993   | 0.5671 | 0.3388  | 0.9493 | 0.02868           | 1010                   | MLH1     | coding-nonsynon                        |
| rs4646285  | 14  | A            | 0.1667    | 0.08403      | G            | 5.189 | 0.02274   | 2.18   | 1.102   | 4.314  | 0.02874           | 1008                   | SLC10A1  | coding-synon                           |
| rs2070672  | 10  | G            | 0.03846   | 0.004545     | A            | 5.346 | 0.02077   | 8.76   | 0.9667  | 79.38  | 0.03002           | 965                    | CYP2E1   | locus                                  |
| rs1023244  | 1   | G            | 0.03922   | 0.1261       | A            | 5.931 | 0.01488   | 0.2828 | 0.09648 | 0.829  | 0.03015           | 961                    | DPYD     | intron,TagSNP:DPYD                     |
| rs608343   | 11  | G            | 0.4151    | 0.2876       | A            | 5.318 | 0.02111   | 1.758  | 1.086   | 2.846  | 0.03015           | 961                    | LRP5     | intron                                 |
| rs20580    | 19  | A            | 0.5926    | 0.4534       | C            | 5.743 | 0.01655   | 1.754  | 1.105   | 2.782  | 0.03303           | 877                    | LIG1     | coding-synon                           |
| rs2180314  | 6   | C            | 0.4804    | 0.3553       | G            | 4.622 | 0.03157   | 1.678  | 1.045   | 2.695  | 0.03345           | 866                    | GSTA2    | coding-nonsynon,TagSNP:GSTA1_2_cluster |
| rs6971     | 22  | T            | 0.26      | 0.3919       | C            | 5.265 | 0.02176   | 0.5452 | 0.3236  | 0.9187 | 0.03511           | 825                    | BZRP     | coding-nonsynon                        |
| rs1760215  | 1   | G            | 0.125     | 0.05804      | A            | 4.364 | 0.03671   | 2.319  | 1.034   | 5.197  | 0.03554           | 815                    | DPYD     | intron,TagSNP:DPYD                     |
| rs2273697  | 10  | A            | 0.2685    | 0.1681       | G            | 4.695 | 0.03025   | 1.817  | 1.054   | 3.132  | 0.0358            | 809                    | ABCC2    | coding-nonsynon,TagSNP:ABCC2           |
| rs11568943 | 4   | A            | 0.1111    | 0.05042      | G            | 4.239 | 0.03951   | 2.354  | 1.021   | 5.426  | 0.03652           | 793                    | EGF      | coding-nonsynon                        |
| rs1760944  | 14  | A            | 0.3333    | 0.458        | C            | 4.741 | 0.02945   | 0.5917 | 0.3682  | 0.951  | 0.03657           | 792                    | APEX1    | locus,untranslated                     |
| rs2279344  | 19  | G            | 0.4712    | 0.3419       | A            | 5.099 | 0.02395   | 1.715  | 1.072   | 2.745  | 0.03718           | 779                    | CYP2B6   | locus,intron                           |
| rs182623   | 6   | A            | 0.1759    | 0.2815       | T            | 4.434 | 0.03522   | 0.5449 | 0.3081  | 0.9637 | 0.04039           | 717                    | GSTA4    | locus,TagSNP:GSTA4                     |
| rs4577050  | 15  | G            | 0.25      | 0.3675       | A            | 4.361 | 0.03677   | 0.5736 | 0.3394  | 0.9696 | 0.04113           | 704                    | SLC12A6  | coding-synon                           |
| rs3730849  | 19  | T            | 0.4074    | 0.2815       | C            | 5.404 | 0.02009   | 1.755  | 1.089   | 2.826  | 0.04137           | 700                    | LIG1     | intron                                 |
| rs6163     | 10  | A            | 0.4352    | 0.3246       | C            | 3.892 | 0.04852   | 1.603  | 1.001   | 2.567  | 0.04258           | 680                    | CYP17A1  | coding-synon                           |
| rs17098707 | 10  | T            | 0         | 0.03846      | A            | 4.266 | 0.03888   | n/a    | n/a     | n/a    | 0.04517           | 641                    | GRK5     | coding-nonsynon                        |
| rs11407    | 19  | A            | 0.2358    | 0.1429       | G            | 4.463 | 0.03463   | 1.852  | 1.04    | 3.297  | 0.04574           | 633                    | XRCC1    | Promoter                               |
| rs182482   | 16  | G            | 0.3627    | 0.2522       | A            | 4.229 | 0.03973   | 1.688  | 1.022   | 2.787  | 0.04677           | 619                    | ABCC1    | intron,TagSNP:ABCC1                    |
