# Supplementary material
Source: PubMed Central journal article supplement (PMC3601865)
Supplement: supp_blood-2008-02-140434_TableS05.pdf [file supp_blood-2008-02-140434_TableS05.pdf]

## Part 1

| SNP        | CHR | TEST  | Genotype/alleles<br>in cases | Genotype/alleles<br>in controls | CHISQ | DF | P         | Emperical<br>p-value | Number of<br>Permutations | Gene     | Functional class                        |
|------------|-----|-------|------------------------------|---------------------------------|-------|----|-----------|----------------------|---------------------------|----------|-----------------------------------------|
| rs2023410  | 8   | TREND | 11/89                        | 58/166                          | 10.89 | 1  | 0.0009655 | 0.000806             | 37202                     | ADRB3    | untranslated                            |
| rs3212948  | 19  | TREND | 21/77                        | 90/134                          | 11.27 | 1  | 0.0007873 | 0.001004             | 29880                     | ERCC1    | intron                                  |
| rs4364327  | 4   | TREND | 50/58                        | 61/177                          | 11    | 1  | 0.0009102 | 0.00154              | 19480                     | UGT2B7   | intron                                  |
| rs7514102  | 1   | REC   | 14/39                        | 9/108                           | 10.93 | 1  | 0.0009464 | 0.003191             | 9400                      | PROK1    | coding-nonsynon                         |
| rs1049007  | 20  | GENO  | 12/19/23                     | 8/70/39                         | 12.66 | 2  | 0.00178   | 0.003465             | 8658                      | BMP2     | coding-synon                            |
| rs235768   | 20  | GENO  | 11/18/25                     | 9/71/39                         | 12.11 | 2  | 0.002344  | 0.003619             | 8289                      | BMP2     | coding-nonsynon                         |
| rs4148217  | 2   | TREND | 31/77                        | 36/202                          | 8.607 | 1  | 0.003348  | 0.004134             | 7256                      | ABCG8    | coding-nonsynon                         |
| rs17683288 | 8   | TREND | 13/93                        | 11/227                          | 7.135 | 1  | 0.00756   | 0.004294             | 6986                      | ARHGEF10 | coding-nonsynon                         |
| rs11765552 | 7   | TREND | 63/45                        | 94/144                          | 9.258 | 1  | 0.002345  | 0.004777             | 6279                      | LMTK2    | coding-nonsynon                         |
| rs4792147  | 17  | REC   | 22/32                        | 22/97                           | 9.699 | 1  | 0.001844  | 0.006023             | 4980                      | ALOX15B  | coding-nonsynon                         |
| rs215106   | 16  | TREND | 21/87                        | 22/216                          | 7.366 | 1  | 0.006648  | 0.007559             | 3968                      | ABCC1    | intron,TagSNP:ABCC1                     |
| rs2292245  | 3   | TREND | 29/79                        | 34/204                          | 7.508 | 1  | 0.006141  | 0.008937             | 3356                      | PTPRG    | coding-nonsynon                         |
| rs2305801  | 19  | TREND | 11/93                        | 51/175                          | 6.937 | 1  | 0.008442  | 0.01021              | 2937                      | CYP4F11  | coding-synon                            |
| rs2582790  | 1   | DOM   | 37/17                        | 53/62                           | 7.427 | 1  | 0.006424  | 0.01036              | 2895                      | HMGCS2   | Promoter                                |
| rs2180314  | 6   | REC   | 14/37                        | 12/102                          | 7.603 | 1  | 0.005826  | 0.01132              | 2649                      | GSTA2    | coding-nonsynony,TagSNP:GSTA1_2_cluster |
| rs3731055  | 3   | TREND | 4/104                        | 0/238                           | 9.023 | 1  | 0.002665  | 0.01165              | 2574                      | XPC      | locus,intron                            |
| rs2227869  | 13  | TREND | 6/100                        | 3/235                           | 5.726 | 1  | 0.01671   | 0.01218              | 2463                      | ERCC5    | coding-nonsynon                         |
| rs6018     | 1   | TREND | 11/95                        | 7/223                           | 6.533 | 1  | 0.01059   | 0.01231              | 2436                      | F5       | coding-nonsynon                         |
| rs10895065 | 11  | TREND | 41/53                        | 68/154                          | 6.794 | 1  | 0.009149  | 0.01312              | 2286                      | PGR      | intron                                  |
| rs4839469  | 1   | TREND | 7/101                        | 38/196                          | 6.476 | 1  | 0.01094   | 0.01317              | 2277                      | VANGL1   | coding-nonsynon                         |
| rs6163     | 10  | REC   | 12/42                        | 8/106                           | 8.077 | 1  | 0.004482  | 0.01345              | 2229                      | CYP17A1  | coding-synon                            |
| rs156641   | 19  | TREND | 49/55                        | 75/161                          | 7.443 | 1  | 0.006368  | 0.01428              | 2100                      | LIG1     | intron                                  |
| rs3730849  | 19  | REC   | 14/40                        | 11/108                          | 8.362 | 1  | 0.003832  | 0.01489              | 1946                      | LIG1     | intron                                  |
| rs215101   | 16  | TREND | 23/85                        | 27/211                          | 6.437 | 1  | 0.01118   | 0.01514              | 1914                      | ABCC1    | intron,TagSNP:ABCC1                     |
| rs7438135  | 4   | REC   | 16/37                        | 16/103                          | 6.788 | 1  | 0.009176  | 0.01791              | 1618                      | UGT2B7   | locus                                   |
| rs1023244  | 1   | TREND | 4/98                         | 28/194                          | 5.399 | 1  | 0.02015   | 0.01882              | 1540                      | DPYD     | intron,TagSNP:DPYD                      |
| rs2037483  | 7   | TREND | 59/47                        | 93/139                          | 6.994 | 1  | 0.00818   | 0.01909              | 1518                      | HUS1     | intron                                  |
| rs1064796  | 19  | TREND | 17/91                        | 65/171                          | 5.643 | 1  | 0.01752   | 0.02153              | 1346                      | CYP4F11  | coding-synon                            |
| rs4588522  | 4   | REC   | 16/38                        | 15/103                          | 7.176 | 1  | 0.007387  | 0.02182              | 1328                      | UGT2B7   | intron                                  |
| rs3795837  | 1   | TREND | 24/84                        | 28/208                          | 5.664 | 1  | 0.01732   | 0.02296              | 1262                      | ATF3     | intron                                  |

## Part 2

| SNP        | CHR | TEST  | Genotype/alleles<br>in cases | Genotype/alleles<br>in controls | CHISQ | DF | P        | Emperical<br>p-value | Number of<br>Permutations | Gene     | Functional class    |
|------------|-----|-------|------------------------------|---------------------------------|-------|----|----------|----------------------|---------------------------|----------|---------------------|
| rs17561    | 2   | GENO  | 11/13/30                     | 10/54/53                        | 9.604 | 2  | 0.008215 | 0.02326              | 1246                      | IL1A     | coding-nonsynon     |
| rs1056663  | 7   | TREND | 59/47                        | 96/136                          | 5.912 | 1  | 0.01504  | 0.02528              | 1146                      | HUS1     | coding-synon        |
| rs7662029  | 4   | REC   | 16/37                        | 16/101                          | 6.51  | 1  | 0.01073  | 0.02578              | 1124                      | UGT2B7   | locus               |
| rs7441750  | 4   | REC   | 16/37                        | 16/101                          | 6.51  | 1  | 0.01073  | 0.02708              | 1070                      | UGT2B7   | intron              |
| rs7441774  | 4   | REC   | 15/38                        | 14/99                           | 6.336 | 1  | 0.01183  | 0.02708              | 1070                      | UGT2B7   | intron              |
| rs268      | 8   | TREND | 5/89                         | 3/217                           | 4.262 | 1  | 0.03898  | 0.02723              | 1064                      | LPL      | coding-nonsynon     |
| rs17572019 | 5   | TREND | 3/93                         | 23/199                          | 5.13  | 1  | 0.02352  | 0.02725              | 1100                      | PPARGC1B | coding-nonsynon     |
| rs932477   | 6   | TREND | 6/102                        | 34/200                          | 5.267 | 1  | 0.02173  | 0.02738              | 1058                      | ESR1     | intron              |
| rs3813865  | 10  | TREND | 5/103                        | 2/236                           | 5.495 | 1  | 0.01907  | 0.02759              | 1050                      | CYP2E1   | locus,TagSNP:CYP2E1 |
| rs2070672  | 10  | TREND | 4/100                        | 1/219                           | 5.431 | 1  | 0.01978  | 0.02759              | 1050                      | CYP2E1   | locus               |
| rs4646285  | 14  | TREND | 18/90                        | 20/218                          | 5.545 | 1  | 0.01853  | 0.02802              | 1034                      | SLC10A1  | coding-synon        |
| rs1760944  | 14  | DOM   | 28/26                        | 85/34                           | 6.284 | 1  | 0.01218  | 0.02996              | 967                       | APEX1    | locus,untranslated  |
| rs1801275  | 16  | TREND | 13/95                        | 53/183                          | 5.062 | 1  | 0.02445  | 0.03092              | 937                       | IL4R     | coding-nonsynon     |
| rs17098707 | 10  | TREND | 0/108                        | 9/225                           | 4.385 | 1  | 0.03626  | 0.03258              | 889                       | GRK5     | coding-nonsynon     |
| rs608343   | 11  | TREND | 44/62                        | 65/161                          | 4.902 | 1  | 0.02683  | 0.03322              | 872                       | LRP5     | intron              |
| rs6971     | 22  | DOM   | 20/30                        | 68/43                           | 6.288 | 1  | 0.01216  | 0.03469              | 835                       | BZRP     | coding-nonsynon     |
| rs2252784  | 12  | DOM   | 37/14                        | 62/54                           | 5.354 | 1  | 0.02067  | 0.03494              | 829                       | PTPRB    | coding-nonsynon     |
| rs8551     | 11  | DOM   | 18/36                        | 63/56                           | 5.736 | 1  | 0.01663  | 0.03816              | 759                       | DPAGT1   | locus,untranslated  |
| rs801720   | 22  | TREND | 27/75                        | 92/140                          | 5.26  | 1  | 0.02182  | 0.03887              | 745                       | CERK     | coding-nonsynon     |
| rs1047768  | 13  | TREND | 48/58                        | 71/163                          | 5.445 | 1  | 0.01963  | 0.03935              | 736                       | ERCC5    | coding-synon        |
| rs11568943 | 4   | TREND | 12/96                        | 12/226                          | 4.58  | 1  | 0.03234  | 0.03962              | 731                       | EGF      | coding-nonsynon     |
| rs1131620  | 19  | DOM   | 42/12                        | 69/48                           | 5.736 | 1  | 0.01662  | 0.04073              | 711                       | LTBP4    | intron              |
| rs20580    | 19  | TREND | 64/44                        | 107/129                         | 5.55  | 1  | 0.01848  | 0.04367              | 663                       | LIG1     | coding-synon        |
| rs1885472  | 10  | DOM   | 22/32                        | 69/49                           | 4.676 | 1  | 0.03059  | 0.04482              | 646                       | SIRT1    | intron              |
| rs1799977  | 3   | TREND | 27/73                        | 90/138                          | 5.253 | 1  | 0.02191  | 0.04723              | 613                       | MLH1     | coding-nonsynon     |
| rs1760215  | 1   | TREND | 13/91                        | 13/211                          | 4.375 | 1  | 0.03647  | 0.0477               | 607                       | DPYD     | intron,TagSNP:DPYD  |
| rs182623   | 6   | TREND | 19/89                        | 67/171                          | 4.679 | 1  | 0.03054  | 0.04809              | 602                       | GSTA4    | locus,TagSNP:GSTA4  |
| rs6220     | 12  | REC   | 8/46                         | 6/113                           | 4.77  | 1  | 0.02896  | 0.04858              | 596                       | IGF1     | untranslated        |
| rs4337789  | 4   | REC   | 15/39                        | 15/103                          | 5.84  | 1  | 0.01567  | 0.04974              | 582                       | UGT2B7   | intron              |
| rs2725362  | 8   | TREND | 38/66                        | 114/114                         | 5.452 | 1  | 0.01955  | 0.04991              | 560                       | WRN      | coding-nonsynon     |
