# Supplementary material
Source: PubMed Central journal article supplement (PMC3601865)
Supplement: supp_blood-2008-02-140434_TableS06.pdf [file supp_blood-2008-02-140434_TableS06.pdf]

## Part 1

| SNP        | CHR | Minor allele | MAF cases | MAF controls | Major allele | CHISQ | P        | OR      | L95      | U95    | Emperical P-value | Number of permutations | Gene     | Functional Class               |
|------------|-----|--------------|-----------|--------------|--------------|-------|----------|---------|----------|--------|-------------------|------------------------|----------|--------------------------------|
| rs17197552 | 3   | G            | 0.03333   | 0.4306       | A            | 15.52 | 8.17E-05 | 0.04561 | 0.005887 | 0.3533 | 3.76E-05          | 797000                 | PPP2R3A  | coding-nonsynon                |
| rs735943   | 1   | T            | 0.6       | 0.2917       | C            | 8.525 | 0.003503 | 3.643   | 1.496    | 8.869  | 0.001078          | 27832                  | EXO1     | coding-nonsynon                |
| rs9462088  | 6   | A            | 0.2       | 0            | G            | 15.3  | 9.17E-05 | n/a     | n/a      | n/a    | 0.001122          | 26730                  | FANCE    | coding-nonsynon                |
| rs1148555  | 12  | G            | 0         | 0.2353       | A            | 8.436 | 0.003678 | n/a     | n/a      | n/a    | 0.003854          | 7784                   | MBD6     | intron                         |
| rs4713853  | 6   | C            | 0.2       | 0.02857      | T            | 8.385 | 0.003783 | 8.5     | 1.606    | 45     | 0.005164          | 5808                   | PPARD    | intron                         |
| rs1284605  | 12  | T            | 0         | 0.2222       | C            | 7.907 | 0.004924 | n/a     | n/a      | n/a    | 0.005213          | 5754                   | MBD6     | intron                         |
| rs1129923  | 1   | A            | 0.2       | 0.02778      | G            | 8.69  | 0.0032   | 8.75    | 1.654    | 46.3   | 0.005661          | 5298                   | DUSP23   | coding-nonsynon                |
| rs2927922  | 10  | T            | 0.6333    | 0.3194       | A            | 8.614 | 0.003336 | 3.68    | 1.507    | 8.985  | 0.00621           | 4830                   | PDSS1    | intron                         |
| rs1126671  | 4   | A            | 0.5       | 0.2273       | G            | 6.553 | 0.01047  | 3.4     | 1.301    | 8.884  | 0.006308          | 4755                   | ADH4     | coding-nonsynon                |
| rs2489581  | 10  | G            | 0.6333    | 0.3194       | C            | 8.614 | 0.003336 | 3.68    | 1.507    | 8.985  | 0.006478          | 4630                   | PDSS1    | intron                         |
| rs6457816  | 6   | C            | 0.1333    | 0            | T            | 9.992 | 0.001572 | n/a     | n/a      | n/a    | 0.006485          | 4625                   | PPARD    | intron                         |
| rs289747   | 16  | A            | 0.6       | 0.2714       | G            | 9.726 | 0.001817 | 4.026   | 1.636    | 9.909  | 0.007628          | 3932                   | CETP     | 3' UTR                         |
| rs1558093  | 5   | C            | 0.5       | 0.2222       | T            | 7.724 | 0.00545  | 3.5     | 1.414    | 8.661  | 0.007714          | 3888                   | SMAD5    | Promoter                       |
| rs1135961  | 20  | T            | 0.3       | 0.07143      | C            | 9.112 | 0.002539 | 5.571   | 1.68     | 18.48  | 0.007754          | 3868                   | PSMA7    | coding-synon,untranslated      |
| rs697221   | 12  | A            | 0         | 0.2          | G            | 6.533 | 0.01059  | n/a     | n/a      | n/a    | 0.007951          | 3772                   | DDIT3    | coding-synon                   |
| rs6003071  | 22  | C            | 0.7333    | 0.4028       | T            | 9.256 | 0.002348 | 4.078   | 1.599    | 10.4   | 0.008444          | 3552                   | MT       | intron                         |
| rs2040968  | 7   | C            | 0.4667    | 0.2083       | T            | 6.945 | 0.008404 | 3.325   | 1.331    | 8.305  | 0.009066          | 3308                   | HGF      | intron                         |
| rs2214827  | 7   | G            | 0.4667    | 0.2083       | A            | 6.945 | 0.008404 | 3.325   | 1.331    | 8.305  | 0.009066          | 3308                   | HGF      | intron                         |
| rs3093873  | 14  | T            | 0.1071    | 0            | C            | 7.737 | 0.005411 | n/a     | n/a      | n/a    | 0.01076           | 2787                   | PARP2    | locus                          |
| rs1800787  | 4   | T            | 0.4286    | 0.2143       | C            | 4.601 | 0.03195  | 2.75    | 1.073    | 7.05   | 0.01092           | 2745                   | FGB      | locus                          |
| rs1341162  | 10  | A            | 0.5714    | 0.3235       | G            | 5.097 | 0.02397  | 2.788   | 1.128    | 6.889  | 0.011             | 2727                   | CYP2C9   | intron,TagSNP:CYP2C9_8_cluster |
| rs2707466  | 7   | G            | 0.6       | 0.3472       | A            | 5.549 | 0.01849  | 2.82    | 1.173    | 6.778  | 0.01236           | 2427                   | WNT16    | coding-nonsynon                |
| rs743535   | 10  | T            | 0.3077    | 0.1061       | C            | 5.557 | 0.01841  | 3.746   | 1.194    | 11.75  | 0.01353           | 2217                   | CYP2E1   | intron,TagSNP:CYP2E1           |
| rs3793524  | 9   | C            | 0.6       | 0.3056       | G            | 7.702 | 0.005516 | 3.409   | 1.406    | 8.268  | 0.01371           | 2187                   | PTPN3    | coding-nonsynon                |
| rs3741927  | 12  | G            | 0.07692   | 0            | A            | 5.499 | 0.01903  | n/a     | n/a      | n/a    | 0.01422           | 2109                   | DYRK4    | coding-nonsynon                |
| rs2295837  | 6   | T            | 0.2       | 0.04167      | A            | 6.599 | 0.0102   | 5.75    | 1.333    | 24.8   | 0.01598           | 1876                   | KIAA0274 | coding-nonsynon                |
| rs10977171 | 9   | C            | 0.3571    | 0.1571       | G            | 4.752 | 0.02927  | 2.98    | 1.09     | 8.148  | 0.01671           | 1794                   | PTPRD    | coding-nonsynon                |
| rs4148217  | 2   | A            | 0.3667    | 0.1389       | C            | 6.72  | 0.009534 | 3.589   | 1.322    | 9.745  | 0.01828           | 1640                   | ABCG8    | coding-nonsynon                |
| rs2295275  | 6   | A            | 0.2333    | 0.05556      | T            | 6.956 | 0.008353 | 5.174   | 1.387    | 19.3   | 0.01876           | 1598                   | TRERF1   | coding-nonsynon                |
| rs2908004  | 7   | C            | 0.6       | 0.3611       | T            | 4.927 | 0.02644  | 2.654   | 1.107    | 6.363  | 0.01954           | 1534                   | WNT16    | coding-nonsynon                |
| rs9282626  | 11  | C            | 0.1       | 0            | T            | 7.418 | 0.006457 | n/a     | n/a      | n/a    | 0.02094           | 1432                   | CAT      | locus                          |

## Part 2

| SNP        | CHR | Minor allele | MAF cases | MAF controls | Major allele | CHISQ | P        | OR     | L95     | U95    | Emperical P-value | Number of permutations | Gene     | Functional Class                |
|------------|-----|--------------|-----------|--------------|--------------|-------|----------|--------|---------|--------|-------------------|------------------------|----------|---------------------------------|
| rs10018239 | 4   | G            | 0.1333    | 0.3571       | A            | 5.109 | 0.0238   | 0.2769 | 0.08675 | 0.884  | 0.02108           | 1422                   | PPARGC1A | intron, TAG ERROR               |
| rs667565   | 1   | G            | 0.2333    | 0.4444       | A            | 3.996 | 0.0456   | 0.3804 | 0.1449  | 0.9989 | 0.02126           | 1410                   | DPYD     | intron, TagSNP:DPYD             |
| rs1126670  | 4   | G            | 0.4       | 0.1714       | T            | 6.015 | 0.01418  | 3.222  | 1.235   | 8.408  | 0.02132           | 1406                   | ADH4     | coding-synon                    |
| rs827500   | 1   | T            | 0.5667    | 0.3472       | G            | 4.21  | 0.04018  | 2.458  | 1.03    | 5.868  | 0.02198           | 1364                   | DPYD     | intron, TagSNP:DPYD             |
| rs2227869  | 13  | C            | 0.1       | 0            | G            | 7.418 | 0.006457 | n/a    | n/a     | n/a    | 0.02204           | 1360                   | ERCC5    | coding-nonsynon                 |
| rs4646285  | 14  | A            | 0.2       | 0.04167      | G            | 6.599 | 0.0102   | 5.75   | 1.333   | 24.8   | 0.02274           | 1318                   | SLC10A1  | coding-synon                    |
| rs183484   | 11  | T            | 0.3       | 0.5429       | G            | 4.972 | 0.02576  | 0.3609 | 0.145   | 0.898  | 0.02364           | 1268                   | RRM1     | coding-synon                    |
| rs17607    | 17  | A            | 0.1333    | 0.01389      | G            | 6.481 | 0.0109   | 10.92  | 1.166   | 102.3  | 0.02402           | 1248                   | CD68     | coding-nonsynon                 |
| rs17722293 | 5   | T            | 0.1       | 0            | C            | 7.418 | 0.006457 | n/a    | n/a     | n/a    | 0.02425           | 1236                   | SH3TC2   | coding-nonsynon                 |
| rs6901410  | 6   | C            | 0.1333    | 0.01389      | T            | 6.481 | 0.0109   | 10.92  | 1.166   | 102.3  | 0.02527           | 1186                   | PPARD    | intron                          |
| rs6902123  | 6   | C            | 0.1333    | 0.01389      | T            | 6.481 | 0.0109   | 10.92  | 1.166   | 102.3  | 0.02527           | 1186                   | PPARD    | intron                          |
| rs7739752  | 6   | T            | 0.1333    | 0.01389      | C            | 6.481 | 0.0109   | 10.92  | 1.166   | 102.3  | 0.02527           | 1186                   | PPARD    | intron                          |
| rs7903344  | 10  | C            | 0.3       | 0.5714       | T            | 6.191 | 0.01284  | 0.3214 | 0.129   | 0.8011 | 0.02681           | 1118                   | CHUK     | coding-nonsynon                 |
| rs4135113  | 12  | A            | 0.1333    | 0.01389      | G            | 6.481 | 0.0109   | 10.92  | 1.166   | 102.3  | 0.0276            | 1086                   | TDG      | coding-nonsynon                 |
| rs3258     | 8   | C            | 0.5667    | 0.3194       | T            | 5.43  | 0.0198   | 2.786  | 1.161   | 6.688  | 0.02796           | 1072                   | FDFT1    | untranslated                    |
| rs4947324  | 6   | T            | 0.1       | 0            | C            | 7.015 | 0.008084 | n/a    | n/a     | n/a    | 0.02938           | 1020                   | TNF      | locus, TagSNP:TNF               |
| rs1029871  | 3   | G            | 0.5667    | 0.3429       | C            | 4.349 | 0.03704  | 2.506  | 1.045   | 6.011  | 0.02962           | 1012                   | NEK4     | coding-nonsynon                 |
| rs2257212  | 3   | A            | 0.6       | 0.3571       | G            | 5.053 | 0.02458  | 2.7    | 1.121   | 6.503  | 0.02978           | 1040                   | SLC15A2  | coding-nonsynon                 |
| rs1040090  | 1   | A            | 0.4333    | 0.2206       | G            | 4.617 | 0.03166  | 2.702  | 1.075   | 6.793  | 0.03043           | 985                    | DPYD     | intron, TagSNP:DPYD             |
| rs13815    | 22  | C            | 0.2       | 0.4583       | G            | 5.984 | 0.01443  | 0.2955 | 0.1079  | 0.8092 | 0.03099           | 967                    | MT       | coding-nonsynon                 |
| rs504122   | 13  | T            | 0.4667    | 0.2206       | C            | 6.05  | 0.01391  | 3.092  | 1.234   | 7.744  | 0.03175           | 944                    | SPRY2    | coding-nonsynon                 |
| rs3752988  | 10  | C            | 0.6       | 0.3472       | T            | 5.549 | 0.01849  | 2.82   | 1.173   | 6.778  | 0.03185           | 941                    | CYP2C9   | intron, TagSNP:CYP2C9_8_cluster |
| rs1051061  | 2   | G            | 0.2143    | 0.4444       | A            | 4.533 | 0.03325  | 0.3409 | 0.1235  | 0.941  | 0.03247           | 923                    | VRK2     | coding-nonsynon                 |
| rs1799801  | 16  | C            | 0.1333    | 0.3611       | T            | 5.292 | 0.02142  | 0.2722 | 0.08556 | 0.8659 | 0.03796           | 763                    | ERCC4    | coding-synon                    |
| rs483536   | 6   | T            | 0.5       | 0.2571       | A            | 5.602 | 0.01794  | 2.889  | 1.181   | 7.064  | 0.0394            | 735                    | NFKBIE   | locus, TagSNP:HSPCB             |
| rs3803390  | 15  | A            | 0.07143   | 0            | G            | 5.104 | 0.02387  | n/a    | n/a     | n/a    | 0.03962           | 731                    | SLC28A1  | coding-synon                    |
| rs6998760  | 8   | A            | 0.5357    | 0.2813       | C            | 5.483 | 0.0192   | 2.949  | 1.174   | 7.408  | 0.04108           | 705                    | PSKH2    | coding-nonsynon                 |
| rs882709   | 9   | G            | 0.1667    | 0.04167      | C            | 4.578 | 0.03239  | 4.6    | 1.024   | 20.67  | 0.04155           | 697                    | SETX     | coding-nonsynon                 |
| rs877518   | 1   | A            | 0.2667    | 0.08333      | G            | 6.011 | 0.01422  | 4      | 1.25    | 12.8   | 0.04589           | 631                    | ID3      | Promoter                        |
| rs338599   | 19  | C            | 0.1667    | 0.04167      | G            | 4.578 | 0.03239  | 4.6    | 1.024   | 20.67  | 0.04841           | 598                    | CYP2S1   | coding-synon                    |
| rs2283512  | 16  | T            | 0.4333    | 0.2361       | G            | 3.967 | 0.04639  | 2.474  | 1.002   | 6.11   | 0.04858           | 596                    | ABCC1    | intron, TagSNP:ABCC1            |
| rs5361     | 1   | C            | 0.2       | 0.04167      | A            | 6.599 | 0.0102   | 5.75   | 1.333   | 24.8   | 0.0489            | 592                    | SELE     | coding-nonsynon                 |
| rs2246176  | 5   | C            | 0.06667   | 0.25         | T            | 4.515 | 0.03359  | 0.2143 | 0.04638 | 0.9901 | 0.0494            | 586                    | RAD50    | intron, TagSNP:RAD50            |
| rs1130371  | 17  | T            | 0.3333    | 0.1528       | C            | 4.223 | 0.03989  | 2.773  | 1.026   | 7.493  | 0.04966           | 583                    | CCL3     | coding-synon                    |
