# Supplementary material
Source: PubMed Central journal article supplement (PMC3601865)
Supplement: supp_blood-2008-02-140434_TableS07.pdf [file supp_blood-2008-02-140434_TableS07.pdf]

## Part 1

| SNP        | CHR | TEST  | Genotype/alleles<br>in cases | Genotype/alleles<br>in controls | CHISQ | DF | P         | Emperical<br>p-value | Number of<br>Permutations | Gene     | Functional class               |
|------------|-----|-------|------------------------------|---------------------------------|-------|----|-----------|----------------------|---------------------------|----------|--------------------------------|
| rs17197552 | 3   | TREND | 1/29                         | 31/41                           | 17.11 | 1  | 3.53E-05  | 2.90E-05             | 1000000                   | PPP2R3A  | coding-nonsynon                |
| rs735943   | 1   | TREND | 18/12                        | 21/51                           | 10.71 | 1  | 0.001066  | 0.001062             | 28246                     | EXO1     | coding-nonsynon                |
| rs9462088  | 6   | TREND | 6/24                         | 0/72                            | 11.85 | 1  | 0.0005781 | 0.001464             | 20496                     | FANCE    | coding-nonsynon                |
| rs1148555  | 12  | TREND | 0/30                         | 16/52                           | 8.84  | 1  | 0.002946  | 0.003195             | 9390                      | MBD6     | intron                         |
| rs1284605  | 12  | TREND | 0/30                         | 16/56                           | 8.218 | 1  | 0.004149  | 0.003985             | 7528                      | MBD6     | intron                         |
| rs4713853  | 6   | TREND | 6/24                         | 2/68                            | 9.184 | 1  | 0.002442  | 0.00401              | 7480                      | PPARD    | intron                         |
| rs2489581  | 10  | TREND | 19/11                        | 23/49                           | 8.375 | 1  | 0.003805  | 0.004613             | 6503                      | PDSS1    | intron                         |
| rs1558093  | 5   | TREND | 15/15                        | 16/56                           | 8.268 | 1  | 0.004034  | 0.004658             | 6440                      | SMAD5    | Promoter                       |
| rs1129923  | 1   | TREND | 6/24                         | 2/70                            | 9.498 | 1  | 0.002057  | 0.005592             | 5364                      | DUSP23   | coding-nonsynon                |
| rs697221   | 12  | TREND | 0/28                         | 14/56                           | 7.84  | 1  | 0.00511   | 0.006223             | 4820                      | DDIT3    | coding-synon                   |
| rs6457816  | 6   | TREND | 4/26                         | 0/72                            | 10.42 | 1  | 0.001249  | 0.006423             | 4670                      | PPARD    | intron                         |
| rs1341162  | 10  | TREND | 16/12                        | 22/46                           | 7.351 | 1  | 0.006701  | 0.006621             | 4530                      | CYP2C9   | intron,TagSNP:CYP2C9_8_cluster |
| rs1126671  | 4   | TREND | 13/13                        | 15/51                           | 7.527 | 1  | 0.006077  | 0.00674              | 4450                      | ADH4     | coding-nonsynon                |
| rs2927922  | 10  | TREND | 19/11                        | 23/49                           | 7.764 | 1  | 0.005331  | 0.007158             | 4190                      | PDSS1    | intron                         |
| rs289747   | 16  | TREND | 18/12                        | 19/51                           | 7.654 | 1  | 0.005664  | 0.007351             | 4080                      | CETP     | 3' UTR                         |
| rs6003071  | 22  | TREND | 22/8                         | 29/43                           | 7.867 | 1  | 0.005034  | 0.008387             | 3576                      | MT       | intron                         |
| rs2707466  | 7   | TREND | 18/12                        | 25/47                           | 7.363 | 1  | 0.006659  | 0.008387             | 3576                      | WNT16    | coding-nonsynon                |
| rs1135961  | 20  | TREND | 9/21                         | 5/65                            | 7.792 | 1  | 0.005247  | 0.008863             | 3384                      | PSMA7    | coding-synon,untranslated      |
| rs2040968  | 7   | TREND | 14/16                        | 15/57                           | 7.788 | 1  | 0.00526   | 0.009455             | 3172                      | HGF      | intron                         |
| rs2214827  | 7   | TREND | 14/16                        | 15/57                           | 7.788 | 1  | 0.00526   | 0.009455             | 3172                      | HGF      | intron                         |
| rs1800787  | 4   | TREND | 12/16                        | 15/55                           | 6.373 | 1  | 0.01159   | 0.009467             | 3168                      | FGB      | locus                          |
| rs2295837  | 6   | TREND | 6/24                         | 3/69                            | 7.306 | 1  | 0.006873  | 0.01153              | 2601                      | KIAA0274 | coding-nonsynon                |
| rs3093873  | 14  | TREND | 3/25                         | 0/70                            | 7.989 | 1  | 0.004706  | 0.01193              | 2514                      | PARP2    | locus                          |
| rs2908004  | 7   | TREND | 18/12                        | 26/46                           | 6.151 | 1  | 0.01313   | 0.01206              | 2487                      | WNT16    | coding-nonsynon                |
| rs3793524  | 9   | TREND | 18/12                        | 22/50                           | 6.542 | 1  | 0.01054   | 0.01327              | 2259                      | PTPN3    | coding-nonsynon                |
| rs10977171 | 9   | TREND | 10/18                        | 11/59                           | 6.533 | 1  | 0.01059   | 0.01412              | 2124                      | PTPRD    | coding-nonsynon                |
| rs3741927  | 12  | TREND | 2/24                         | 0/70                            | 5.619 | 1  | 0.01777   | 0.01538              | 1950                      | DYRK4    | coding-nonsynon                |
| rs743535   | 10  | TREND | 8/18                         | 7/59                            | 5.762 | 1  | 0.01638   | 0.01739              | 1724                      | CYP2E1   | intron,TagSNP:CYP2E1           |
| rs17607    | 17  | TREND | 4/26                         | 1/71                            | 6.833 | 1  | 0.008948  | 0.01884              | 1644                      | CD68     | coding-nonsynon                |
| rs9282626  | 11  | TREND | 3/27                         | 0/72                            | 7.65  | 1  | 0.005677  | 0.01972              | 1520                      | CAT      | locus                          |
| rs183484   | 11  | TREND | 9/21                         | 38/32                           | 5.428 | 1  | 0.01982   | 0.01985              | 1510                      | RRM1     | coding-synon                   |
| rs1126670  | 4   | TREND | 12/18                        | 12/58                           | 5.937 | 1  | 0.01483   | 0.02126              | 1410                      | ADH4     | coding-synon                   |
| rs667565   | 1   | TREND | 7/23                         | 32/40                           | 6.343 | 1  | 0.01178   | 0.02147              | 1396                      | DPYD     | intron,TagSNP:DPYD             |
| rs4135113  | 12  | TREND | 4/26                         | 1/71                            | 6.833 | 1  | 0.008948  | 0.02151              | 1394                      | TDG      | coding-nonsynon                |
| rs17722293 | 5   | TREND | 3/27                         | 0/72                            | 7.65  | 1  | 0.005677  | 0.02166              | 1384                      | SH3TC2   | coding-nonsynon                |
| rs1051061  | 2   | TREND | 6/22                         | 32/40                           | 4.619 | 1  | 0.03162   | 0.02166              | 1384                      | VRK2     | coding-nonsynon                |
| rs827500   | 1   | TREND | 17/13                        | 25/47                           | 5.358 | 1  | 0.02062   | 0.02204              | 1360                      | DPYD     | intron,TagSNP:DPYD             |
| rs6901410  | 6   | TREND | 4/26                         | 1/71                            | 6.833 | 1  | 0.008948  | 0.02211              | 1356                      | PPARD    | intron                         |
| rs6902123  | 6   | TREND | 4/26                         | 1/71                            | 6.833 | 1  | 0.008948  | 0.02211              | 1356                      | PPARD    | intron                         |
| rs7739752  | 6   | TREND | 4/26                         | 1/71                            | 6.833 | 1  | 0.008948  | 0.02211              | 1356                      | PPARD    | intron                         |
| rs2295275  | 6   | TREND | 7/23                         | 4/68                            | 6.424 | 1  | 0.01126   | 0.02254              | 1330                      | TRERF1   | coding-nonsynon                |
| rs483536   | 6   | TREND | 15/15                        | 18/52                           | 4.911 | 1  | 0.02669   | 0.02281              | 1358                      | NFKBIE   | locus, TagSNP:HSPCB            |

## Part 2

| SNP        | CHR | TEST  | Genotype/alleles<br>in cases | Genotype/alleles<br>in controls | CHISQ | DF | P        | Emperical<br>p-value | Number of<br>Permutations | Gene     | Functional class                |
|------------|-----|-------|------------------------------|---------------------------------|-------|----|----------|----------------------|---------------------------|----------|---------------------------------|
| rs2227869  | 13  | TREND | 3/27                         | 0/72                            | 7.65  | 1  | 0.005677 | 0.02288              | 1310                      | ERCC5    | coding-nonsynon                 |
| rs1029871  | 3   | TREND | 17/13                        | 24/46                           | 4.92  | 1  | 0.02655  | 0.02292              | 1308                      | NEK4     | coding-nonsynon                 |
| rs4947324  | 6   | TREND | 3/27                         | 0/68                            | 7.243 | 1  | 0.007116 | 0.02558              | 1172                      | TNF      | locus, TagSNP:TNF               |
| rs6998760  | 8   | TREND | 15/13                        | 18/46                           | 4.975 | 1  | 0.02572  | 0.02566              | 1168                      | PSKH2    | coding-nonsynon                 |
| rs2300697  | 2   | TREND | 14/14                        | 21/49                           | 5.6   | 1  | 0.01796  | 0.02611              | 1148                      | SRD5A2   | intron                          |
| rs1799801  | 16  | TREND | 4/26                         | 26/46                           | 5.506 | 1  | 0.01895  | 0.02625              | 1142                      | ERCC4    | coding-synon                    |
| rs4148217  | 2   | TREND | 11/19                        | 10/62                           | 6.106 | 1  | 0.01347  | 0.02715              | 1104                      | ABCG8    | coding-nonsynon                 |
| rs10018239 | 4   | TREND | 4/26                         | 25/45                           | 5.786 | 1  | 0.01615  | 0.02944              | 1018                      | PPARGC1A | intron                          |
| rs4646285  | 14  | TREND | 6/24                         | 3/69                            | 5.753 | 1  | 0.01646  | 0.03018              | 993                       | SLC10A1  | coding-synon                    |
| rs3803390  | 15  | TREND | 2/26                         | 0/70                            | 5.213 | 1  | 0.02242  | 0.03168              | 946                       | SLC28A1  | coding-synon                    |
| rs504122   | 13  | TREND | 14/16                        | 15/53                           | 5.182 | 1  | 0.02282  | 0.03299              | 878                       | SPRY2    | coding-nonsynon                 |
| rs7903344  | 10  | TREND | 9/21                         | 40/30                           | 5.339 | 1  | 0.02086  | 0.03416              | 848                       | CHUK     | coding-nonsynon                 |
| rs1040090  | 1   | TREND | 13/17                        | 15/53                           | 5.13  | 1  | 0.02352  | 0.03515              | 824                       | DPYD     | intron, TagSNP:DPYD             |
| rs3258     | 8   | TREND | 17/13                        | 23/49                           | 5.361 | 1  | 0.0206   | 0.03594              | 806                       | FDFT1    | untranslated                    |
| rs882709   | 9   | TREND | 5/25                         | 3/69                            | 5.004 | 1  | 0.02529  | 0.03676              | 788                       | SETX     | coding-nonsynon                 |
| rs5361     | 1   | TREND | 6/24                         | 3/69                            | 4.745 | 1  | 0.02938  | 0.03699              | 783                       | SELE     | coding-nonsynon                 |
| rs3752988  | 10  | TREND | 18/12                        | 25/47                           | 5.16  | 1  | 0.02311  | 0.03742              | 774                       | CYP2C9   | intron, TagSNP:CYP2C9_8_cluster |
| rs13815    | 22  | TREND | 6/24                         | 33/39                           | 5.726 | 1  | 0.01672  | 0.03756              | 771                       | MT       | coding-nonsynon                 |
| rs373496   | 16  | TREND | 8/20                         | 8/60                            | 5.042 | 1  | 0.02474  | 0.03893              | 744                       | TNFRSF17 | coding-nonsynon                 |
| rs3212961  | 19  | TREND | 1/29                         | 13/59                           | 3.851 | 1  | 0.04971  | 0.03962              | 731                       | ERCC1    | intron                          |
| rs7921     | 17  | TREND | 12/18                        | 15/55                           | 4.411 | 1  | 0.03571  | 0.04022              | 720                       | CD79B    | untranslated                    |
| rs2257212  | 3   | TREND | 18/12                        | 25/45                           | 4.76  | 1  | 0.02913  | 0.04197              | 690                       | SLC15A2  | coding-nonsynon                 |
| rs1799999  | 7   | TREND | 11/19                        | 14/56                           | 4.667 | 1  | 0.03075  | 0.04271              | 678                       | PPP1R3A  | coding-nonsynon                 |
| rs1042718  | 5   | TREND | 10/20                        | 12/60                           | 4.135 | 1  | 0.042    | 0.04421              | 655                       | ADRB2    | coding-synon                    |
| rs752760   | 15  | TREND | 9/21                         | 38/34                           | 4.048 | 1  | 0.04423  | 0.04468              | 648                       | GLDN     | locus                           |
| rs529948   | 6   | TREND | 7/21                         | 6/64                            | 3.904 | 1  | 0.04818  | 0.0467               | 620                       | NFKBIE   | Promoter                        |
| rs526645   | 1   | TREND | 15/15                        | 21/51                           | 4.15  | 1  | 0.04162  | 0.047                | 616                       | DPYD     | intron, TagSNP:DPYD             |
| rs3798134  | 5   | TREND | 2/28                         | 17/55                           | 4.455 | 1  | 0.0348   | 0.04715              | 614                       | RAD50    | intron, TagSNP:RAD50            |
| rs1800925  | 5   | TREND | 2/28                         | 17/55                           | 4.455 | 1  | 0.0348   | 0.04715              | 614                       | IL13     | locus                           |
| rs638456   | 1   | TREND | 8/22                         | 33/39                           | 4.399 | 1  | 0.03597  | 0.04715              | 614                       | DPYD     | intron, TagSNP:DPYD             |
| rs3181078  | 3   | TREND | 4/26                         | 2/70                            | 4.546 | 1  | 0.033    | 0.04723              | 613                       | CCR1     | locus                           |
| rs1126672  | 4   | TREND | 9/17                         | 11/55                           | 4.155 | 1  | 0.04151  | 0.04723              | 613                       | ADH4     | coding-synon                    |
| rs35683    | 3   | TREND | 19/11                        | 31/41                           | 4.233 | 1  | 0.03964  | 0.04778              | 606                       | GHRL     | intron                          |
| rs552926   | 1   | TREND | 8/20                         | 33/37                           | 4.049 | 1  | 0.04419  | 0.04809              | 602                       | DPYD     | intron, TagSNP:DPYD             |
| rs4149117  | 12  | TREND | 8/22                         | 8/64                            | 4.76  | 1  | 0.02913  | 0.04817              | 601                       | SLCO1B3  | coding-nonsynon                 |
| rs7311358  | 12  | TREND | 8/22                         | 8/64                            | 4.76  | 1  | 0.02913  | 0.04817              | 601                       | SLCO1B3  | coding-nonsynon                 |
| rs2053098  | 12  | TREND | 8/22                         | 8/64                            | 4.76  | 1  | 0.02913  | 0.04817              | 601                       | SLCO1B3  | coding-synon                    |
| rs8192658  | 1   | TREND | 2/26                         | 0/64                            | 4.779 | 1  | 0.02881  | 0.04899              | 591                       | ATF3     | coding-synon                    |
| rs1567868  | 2   | TREND | 6/24                         | 5/67                            | 4.267 | 1  | 0.03885  | 0.04899              | 591                       | IL8RA    | 3' UTR                          |
| rs1005658  | 22  | TREND | 11/15                        | 17/51                           | 4.679 | 1  | 0.03053  | 0.04957              | 584                       | BZRP     | locus                           |
| rs1801394  | 5   | TREND | 16/10                        | 27/41                           | 3.891 | 1  | 0.04855  | 0.04991              | 580                       | MTRR     | coding-nonsynon                 |
