# Supplementary material
Source: PubMed Central journal article supplement (PMC3601865)
Supplement: supp_blood-2008-02-140434_TableS08.pdf [file supp_blood-2008-02-140434_TableS08.pdf]

| SNP                  | Gene     | CHR | Chromosomal Position | Residue WT > NS | Amino Acid Position | Minor Allele | Cases MAF | Controls MAF | Major Allele | SIFT          | Poly Phen prediction     |
|----------------------|----------|-----|----------------------|-----------------|---------------------|--------------|-----------|--------------|--------------|---------------|--------------------------|
| rs10018786           | POLN     | 4   | 2162255              | M/L             | 310                 | G            | 0.055     | 0.1073       | T            | no prediction | benign                   |
| rs1042714            | ADRB2    | 5   | 148186666            | Q/E             | 27                  | G            | 0.4949    | 0.4031       | C            | Tolerated     | benign                   |
| rs1044141            | STK17A   | 7   | 43437520             | K/E             | 361                 | A            | 0.298     | 0.2266       | G            | Tolerated     | benign                   |
| rs10516782/rs2230600 | PTPN13   | 4   | 88048177             | I/M             | 1331/1503/1522/1527 | G            | 0.1134    | 0.2042       | A            | no prediction | benign                   |
| rs1061472            | ATP7B    | 13  | 51422489             | K/R             | 669/831             | A            | 0.5       | 0.4339       | G            | Tolerated     | possibly damaging/benign |
| rs12022378           | DCLRE1B  | 1   | 114160431            | H/Y             | 60                  | T            | 0.2323    | 0.1536       | C            | no prediction | benign                   |
| rs13815              | MT       | 22  | 41853812             | A/G             | 302                 | C            | 0.2576    | 0.3679       | G            | Tolerated     | benign                   |
| rs16879334           | MTRR     | 5   | 7944506              | P/R             | 449/476             | G            | 0         | 0.02835      | C            | no prediction | probably damaging        |
| rs17112809           | MMS19L   | 10  | 99215836             | V/I             | 525                 | T            | 0.025     | 0.002604     | C            | no prediction | benign                   |
| rs17572019           | PPARGC1B | 5   | 149192664            | V/I             | 278                 | A            | 0.06111   | 0.1278       | G            | no prediction | benign                   |
| rs1799999            | PPP1R3A  | 7   | 113112385            | D/Y             | 904                 | T            | 0.06      | 0.1289       | G            | damaging      | probably damaging        |
| rs1801249            | ATP7B    | 13  | 51413355             | V/A             | 932/1139            | T            | 0.5213    | 0.4317       | C            | Tolerated     | benign                   |
| rs1866389            | THBS4    | 5   | 79397021             | A/P             | 386                 | G            | 0.26      | 0.1958       | C            | Tolerated     | benign                   |
| rs2108622            | CYP4F2   | 19  | 15851431             | M/V             | 433                 | T            | 0.31      | 0.2345       | C            | damaging      | benign                   |
| rs2140516            | SLC13A1  | 7   | 122403185            | N/S             | 173                 | C            | 0.3586    | 0.2708       | T            | Tolerated     | benign                   |
| rs216321             | VWF      | 12  | 6014245              | Q/R             | 851                 | T            | 0.07732   | 0.1383       | C            | Tolerated     | benign                   |
| rs2229113            | IL10RA   | 11  | 117374880            | G/R             | 351                 | A            | 0.275     | 0.3516       | G            | no prediction | probably damaging        |
| rs2269429            | TNXB     | 6   | 32137161             | G/S             | 2554                | A            | 0.1263    | 0.075        | G            | damaging      | benign                   |
| rs2281891            | CYP2C18  | 10  | 96483048             | T/M             | 384                 | A            | 0.095     | 0.1605       | G            | damaging      | probably damaging        |
| rs2287622            | ABCB11   | 2   | 169655835            | A/V             | 444                 | T            | 0.3367    | 0.4197       | C            | Tolerated     | benign                   |
| rs2302524            | PLAUR    | 19  | 48848312             | K/R             | 174/219             | C            | 0.234     | 0.1603       | T            | Tolerated     | benign                   |
| rs2304821            | PTPRB    | 12  | 69249886             | M/T             | 939                 | A            | 0.1421    | 0.08639      | G            | Tolerated     | benign                   |
| rs292925             | HMMR     | 5   | 162842294            | A/V             | 468/483             | T            | 0.28      | 0.1979       | C            | Tolerated     | benign                   |
| rs3130618            | BAT4     | 6   | 31740113             | R/L             | 40                  | A            | 0.148     | 0.2266       | C            | Tolerated     | probably damaging        |
| rs3736265            | PPARGC1A | 4   | 23490976             | T/M             | 611                 | A            | 0.025     | 0.09585      | G            | damaging      | benign                   |
| rs3803036            | PTPRR    | 12  | 69425931             | R/K             | 314                 | A            | 0.18      | 0.2539       | G            | Tolerated     | benign                   |
| rs4151060            | BTRC     | 10  | 103288089            | A/S             | 506/542             | T            | 0.1       | 0.04922      | G            | Tolerated     | benign                   |
| rs4253211            | ERCC6    | 10  | 50348323             | R/P             | 1229                | C            | 0.1616    | 0.09896      | G            | Tolerated     | benign                   |
| rs4647201            | EPM2AIP1 | 3   | 37008495             | A/S             | 359                 | A            | 0.03571   | 0.005263     | C            | no prediction | benign                   |
| rs506504             | CHEK1    | 11  | 125030405            | I/V             | 470                 | T            | 0.06633   | 0.02865      | C            | Tolerated     | benign                   |
| rs527221             | DMPK     | 19  | 50967816             | L/V             | 422                 | C            | 0.06122   | 0.1263       | G            | Tolerated     | benign                   |
| rs5760               | TBXAS1   | 7   | 139160106            | V/G             | 390                 | T            | 0.005682  | 0.03141      | G            | Tolerated     | probably damaging        |
| rs578430             | MUSK     | 9   | 110642698            | L/V             | 829                 | T            | 0.06061   | 0.02577      | G            | Tolerated     | benign                   |
| rs5882               | CETP     | 16  | 55573593             | E/A             | 209                 | C            | 0.07576   | 0.03665      | A            | Tolerated     | benign                   |
| rs628031             | SLC22A1  | 6   | 160531256            | V/M             | 408                 | A            | 0.4583    | 0.3729       | G            | Tolerated     | benign                   |
| rs679899             | APOB     | 2   | 21162566             | V/A             | 618                 | A            | 0.3939    | 0.4895       | G            | Tolerated     | benign                   |
| rs7011               | CINP     | 14  | 101884795            | H/R             | 164                 | T            | 0.3081    | 0.2266       | C            | Tolerated     | benign                   |
| rs732774             | ATP7B    | 13  | 51421809             | R/K             | 951                 | G            | 0.5155    | 0.4339       | A            | Tolerated     | benign                   |
| rs753381             | PLCG1    | 20  | 39230879             | Q/E             | 337                 | C            | 0.399     | 0.3237       | G            | Tolerated     | benign                   |
| rs7732671            | PPARGC1B | 5   | 149192436            | A/P             | 202                 | C            | 0.075     | 0.1392       | G            | no prediction | benign                   |
| rs8191613            | NEIL2    | 8   | 11674685             | R/Q             | 102                 | A            | 0         | 0.03109      | G            | no prediction | benign                   |
| rs8191664            | NEIL2    | 8   | 11680962             | R/L             | 256                 | T            | 0         | 0.02332      | G            | no prediction | benign                   |
| rs882709             | SETX     | 9   | 132234560            | A/G             | 659                 | G            | 0.035     | 0.07772      | C            | Tolerated     | benign                   |
| rs956868             | WNK1     | 12  | 861173               | T/P             | 1055                | A            | 0.08081   | 0.1492       | C            | Tolerated     | benign                   |
| rs9808232            | ROCK2    | 2   | 11309718             | T/N             | 430                 | G            | 0.5       | 0.4404       | T            | no prediction | benign                   |
| rs9890721            | MYCBPAP  | 17  | 45958502             | R/W             | 688                 | C            | 0.5       | 0.4136       | T            | no prediction | probably damaging        |
