# Supplementary material
Source: PubMed Central journal article supplement (PMC3601865)
Supplement: supp_blood-2008-02-140434_TableS09.pdf [file supp_blood-2008-02-140434_TableS09.pdf]

| GO Term/Category       | Term                                              | Definition                                                                                                                         | Count | Chip % | group % | P-Value | Gene Symbol                                                                                                                                        |
|------------------------|---------------------------------------------------|------------------------------------------------------------------------------------------------------------------------------------|-------|--------|---------|---------|----------------------------------------------------------------------------------------------------------------------------------------------------|
| GO:0051179             | establishment of localization                     | The directed movement of a cell, substance or cellular entity, such as a protein complex or organelle, to a specific location.     | 24    | 6      | 31.6    | 0.0016  | XRCC5,CYP19A1,PLAUR,CYP2C8,IL4,PON1,XPC,DPYD,ESR1,CYP2C9,COMT,GHR,FGF,CYP2E1,ALDH1A1,VWF,IL12A,NFKB1,NAT2,NEIL2,IFNG,CASP3,GSTA2,APOB,CETP,PPP2R3A |
| GO:0006810             | transport                                         | The directed movement of substances (such as macromolecules, small molecules, ions) into, out of, within or between cells          | 20    | 5      | 26.3    | 0.01    | NEIL2,CYP19A1,ATP7B,CYP2C8,ABCB4,WNK1,DPYD,MTRR,ABCA4,CYP4F2,CYP2C18,ABCB11,CYP2C9,GHR,CYP2E1,CYP2C19,APOB,CETP,ADRB2,PPARD                        |
| GO:0006091             | generation of precursor metabolites and energy    | -                                                                                                                                  | 14    | 3.5    | 18.4    | 0.027   | CYP19A1,NEIL2,LEP,CYP2C8,DPYD,MTRR,PPARGC1B,PPARGC1A,CYP2C18,CYP4F2,CYP2C9,CYP2E1,CYP2C19,PPARD                                                    |
| GO:0005624             | membrane fraction                                 | That fraction of cells, prepared by disruptive biochemical methods, that includes the plasma and other membranes.                  | 13    | 3.2    | 17.1    | 0.059   | CYP19A1,CYP2C8,ABCB4,ABCA4,CYP2C18,CYP4F2,ABCB11,CYP2C9,COMT,CYP2E1,CYP2C19,APOB,NRP1                                                              |
| GO:0005215             | transporter activity                              | Enables the directed movement of substances (such as macromolecules, small molecules, ions) into, out of, within or between cells. | 11    | 2.8    | 14.5    | 0.082   | CYP19A1,NEIL2,ABCB11,ATP7B,PON1,ABCB4,APOB,DPYD,ALDH1A1,MTRR,ABCA4                                                                                 |
| GO:0006118             | electron transport                                | The transport of electrons from an electron donor to an electron acceptor.                                                         | 10    | 2.5    | 13.2    | 0.094   | CYP19A1,CYP2C18,NEIL2,CYP4F2,CYP2C9,CYP2C8,CYP2E1,CYP2C19,DPYD,MTRR                                                                                |
| GO:0006974             | dna damage                                        | response to DNA damage stimulus.                                                                                                   | 9     | 2.2    | 11.8    | 0.09    | CHEK1,MMS19L,LIG1,XRCC5,ERCC6,NEIL2,DCLRE1B,XPC,PARP1                                                                                              |
| GO:0044255             | cellular lipid metabolism                         | cellular lipid metabolism                                                                                                          | 9     | 2.2    | 11.8    | 0.098   | CYP19A1,CYP4F2,MT,IL4,APOB,CETP,PPARD,PPARGC1B,PPARGC1A                                                                                            |
| GO:0006366             | transcription from RNA polymerase II promoter     | transcription from RNA polymerase II promoter                                                                                      | 8     | 2      | 10.5    | 0.062   | ERCC6,IL4,GLI1,PPARD,PARP1,PPARGC1B,PPARGC1A,NFKB1                                                                                                 |
| GO:0006066             | alcohol metabolism                                | alcohol metabolism                                                                                                                 | 8     | 2      | 10.5    | 0.014   | COMT,IL4,APOB,ALDH1A1,CETP,PPARD,PPARGC1B,PPARGC1A                                                                                                 |
| INTERPRO_NAME          | E-class P450, group I                             | Cytochrome P450                                                                                                                    | 7     | 1.8    | 9.2     | 0.037   | CYP19A1,CYP2C18,CYP4F2,CYP2C9,CYP2C8,CYP2E1,CYP2C19                                                                                                |
| KEGG_PATHWAY           | ARACHIDONIC ACID METABOLISM                       | ARACHIDONIC ACID METABOLISM                                                                                                        | 6     | 1.5    | 7.9     | 0.012   | CYP2C18,CYP4F2,CYP2C9,CYP2C8,CYP2E1,CYP2C19                                                                                                        |
| SP_PIR_KEYWORDS        | liver                                             | liver                                                                                                                              | 6     | 1.5    | 7.9     | 0.032   | NAT2,CYP4F2,FGF,GHR,APOB,ALDH1A1                                                                                                                   |
| SP_PIR_KEYWORDS        | electron transfer                                 | electron transfer                                                                                                                  | 6     | 1.5    | 7.9     | 0.032   | CYP19A1,CYP2C18,CYP2C9,CYP2C8,CYP2E1,CYP2C19                                                                                                       |
| GENETIC_ASSOCIATION_DB | PARKINSON'S DISEASE                               | PARKINSON'S DISEASE                                                                                                                | 6     | 1.5    | 7.9     | 0.057   | NAT2,COMT,CYP2E1,PON1,ESR1,NFKB1                                                                                                                   |
| KEGG_PATHWAY           | LINOLEIC ACID METABOLISM                          | LINOLEIC ACID METABOLISM                                                                                                           | 5     | 1.2    | 6.6     | 0.028   | CYP2C18,CYP2C9,CYP2C8,CYP2E1,CYP2C19                                                                                                               |
| GO:0006631             | fatty acid metabolism                             | fatty acid metabolism                                                                                                              | 5     | 1.2    | 6.6     | 0.069   | CYP4F2,MT,PPARD,PPARGC1B,PPARGC1A                                                                                                                  |
| BBID                   | 17.Activators-CAM                                 | 17.Activators-CAM                                                                                                                  | 3     | 0.8    | 3.9     | 0.051   | IFNG,IL4,NFKB1                                                                                                                                     |
| GENETIC_ASSOCIATION_DB | PROSTATE CARCINOMA                                | PROSTATE CARCINOMA                                                                                                                 | 3     | 0.8    | 3.9     | 0.042   | CYP19A1,COMT,ESR1                                                                                                                                  |
| GO:0051427             | nuclear hormone receptor binding                  | nuclear hormone receptor binding                                                                                                   | 3     | 0.8    | 3.9     | 0.085   | PPARD,PPARGC1B,PPARGC1A                                                                                                                            |
| GO:0019395             | fatty acid oxidation                              | fatty acid oxidation                                                                                                               | 3     | 0.8    | 3.9     | 0.085   | PPARD,PPARGC1B,PPARGC1A                                                                                                                            |
| BBID                   | 113.Th1andTh2cells/111.Stress_influences_immunity | -                                                                                                                                  | 3     | 0.8    | 3.9     | 0.098   | IFNG,IL4,IL12A                                                                                                                                     |
| GO:0051427             | hormone receptor binding                          | Interacting selectively with a receptor for hormones.                                                                              | 3     | 0.8    | 3.9     | 0.085   | PPARD,PPARGC1B,PPARGC1A                                                                                                                            |
