# Supplementary material
Source: PubMed Central journal article supplement (PMC3601865)
Supplement: supp_blood-2008-02-140434_TableS10.pdf [file supp_blood-2008-02-140434_TableS10.pdf]

| CHR1 | SNP 1      | Gene 1   | Functional Class 1             | CHR2 | SNP2       | Gene 2   | functional class 2             | Odds Ratio Interaction | STAT  | P        |
|------|------------|----------|--------------------------------|------|------------|----------|--------------------------------|------------------------|-------|----------|
| 1    | rs5745325  | MSH4     | coding-nonsynon                | 5    | rs3733890  | BHMT     | coding-nonsynon                | 4.35                   | 17.85 | 2.39E-05 |
| 1    | rs7169     | SLC16A1  | untranslated                   | 7    | rs1065780  | IGFBP1   | locus                          | 2.994                  | 15.91 | 6.63E-05 |
| 1    | rs1049434  | SLC16A1  | coding-nonsynon                | 7    | rs1065780  | IGFBP1   | locus                          | 2.871                  | 15.29 | 9.23E-05 |
| 1    | rs2007231  | NRAS     | intron                         | 3    | rs35683    | GHRL     | intron                         | 0.3123                 | 15.85 | 6.87E-05 |
| 1    | rs2808630  | CRP      | 3' UTR                         | 16   | rs1801275  | IL4R     | coding-nonsynon                | 5.049                  | 15.56 | 7.99E-05 |
| 1    | rs1801274  | FCGR2A   | coding-nonsynon                | 14   | rs3177429  | GSTZ1    | coding-nonsynon                | 6.989                  | 16.18 | 5.75E-05 |
| 1    | rs2020869  | FMO2     | untranslated                   | 12   | rs2465811  | PTPRB    | coding-nonsynon                | 7.498                  | 16.05 | 6.18E-05 |
| 1    | rs3748022  | IKBKE    | coding-nonsynon                | 16   | rs165974   | ABCC1    | intron,TagSNP:ABCC1            | 10.56                  | 16.65 | 4.49E-05 |
| 1    | rs3748022  | IKBKE    | coding-nonsynon                | 16   | rs246240   | ABCC1    | intron,TagSNP:ABCC1            | 9.065                  | 15.81 | 7.01E-05 |
| 1    | rs1219663  | ACBD3    | intron                         | 12   | rs11226    | RAD52    | untranslated                   | 0.2837                 | 15.54 | 8.08E-05 |
| 2    | rs2300703  | SRD5A2   | intron                         | 10   | rs7071882  | MBL2     | intron                         | 6.183                  | 18.01 | 2.19E-05 |
| 2    | rs2300703  | SRD5A2   | intron                         | 10   | rs11003127 | MBL2     | intron                         | 6.247                  | 18.16 | 2.03E-05 |
| 2    | rs2300703  | SRD5A2   | intron                         | 10   | rs2165810  | MBL2     | intron                         | 6.212                  | 18.31 | 1.88E-05 |
| 2    | rs163077   | CYP1B1   | intron,TagSNP:CYP1B1           | 11   | rs10895065 | PGR      | intron                         | 5.616                  | 15.57 | 7.93E-05 |
| 2    | rs1035130  | IL18R1   | coding-synon                   | 15   | rs6084     | LIPC     | coding-synon                   | 0.2647                 | 16.56 | 4.71E-05 |
| 2    | rs496550   | ABCB11   | untranslated,TagSNP:ABCB11     | 8    | rs3258     | FDFT1    | untranslated                   | 0.2945                 | 16.19 | 5.72E-05 |
| 2    | rs503931   | ABCB11   | intron,TagSNP:ABCB11           | 8    | rs3258     | FDFT1    | untranslated                   | 0.3192                 | 15.31 | 9.11E-05 |
| 2    | rs231775   | CTLA4    | coding-nonsynon                | 3    | rs696217   | GHRL     | coding-nonsynon                | 0.03838                | 16.26 | 5.53E-05 |
| 2    | rs1863703  | STK36    | coding-nonsynon                | 10   | rs1341160  | CYP2C9   | intron,TagSNP:CYP2C9_8_cluster | 59.22                  | 15.72 | 7.36E-05 |
| 4    | rs2960306  | GRK4     | coding-nonsynon                | 6    | rs1801132  | ESR1     | coding-synon                   | 3.939                  | 16.24 | 5.57E-05 |
| 4    | rs1800591  | MTTP     | locus                          | 13   | rs9576175  | CSNK1A1L | coding-nonsynon                | 3.771                  | 15.33 | 9.04E-05 |
| 5    | rs6874005  | NSUN2    | intron                         | 15   | rs3743259  | IGF1R    | intron                         | 3.736                  | 16.15 | 5.85E-05 |
| 5    | rs1946235  | GPX3     | locus                          | 16   | rs246240   | ABCC1    | intron,TagSNP:ABCC1            | 12.66                  | 15.34 | 9.00E-05 |
| 7    | rs1128503  | ABCB1    | coding-synon                   | 17   | rs1799966  | BRCA1    | coding-nonsynon                | 4.044                  | 16.35 | 5.26E-05 |
| 7    | rs7797834  | AKAP9    | coding-synon                   | 11   | rs10895065 | PGR      | intron                         | 4.161                  | 15.3  | 9.17E-05 |
| 7    | rs854544   | PON1     | locus,TagSNP:PON1              | 14   | rs915057   | SYNE2    | intron                         | 3.357                  | 15.68 | 7.51E-05 |
| 7    | rs2269829  | PON1     | intron,TagSNP:PON1             | 14   | rs1256061  | ESR2     | intron                         | 0.2653                 | 16.13 | 5.93E-05 |
| 7    | rs662      | PON1     | coding-nonsynon                | 14   | rs1256061  | ESR2     | intron                         | 0.2594                 | 16.33 | 5.33E-05 |
| 7    | rs1157745  | PON1     | intron,TagSNP:PON1             | 14   | rs1256061  | ESR2     | intron                         | 0.2557                 | 16.56 | 4.72E-05 |
| 8    | rs1047643  | FDFT1    | coding-synon                   | 8    | rs16938893 | GDAP1    | coding-synon                   | 0.183                  | 15.73 | 7.31E-05 |
| 8    | rs3204141  | ZHX2     | coding-synon                   | 10   | rs1926201  | FAS      | Promoter                       | 3.089                  | 15.25 | 9.43E-05 |
| 9    | rs2288087  | ALDH1A1  | intron,TagSNP:ALDH1A1          | 12   | rs2228570  | VDR      | coding-nonsynon                | 3.669                  | 16.55 | 4.73E-05 |
| 9    | rs2288087  | ALDH1A1  | intron,TagSNP:ALDH1A1          | 20   | rs2273642  | NFATC2   | intron                         | 0.2622                 | 15.48 | 8.34E-05 |
| 10   | rs3752988  | CYP2C9   | intron,TagSNP:CYP2C9_8_cluster | 11   | rs183484   | RRM1     | coding-synon                   | 0.3053                 | 15.73 | 7.29E-05 |
| 10   | rs3740469  | SLK      | coding-nonsynon                | 15   | rs4886605  | CYP1A1   | Promoter                       | 8.992                  | 15.2  | 9.68E-05 |
| 11   | rs500760   | PGR      | coding-synon                   | 19   | rs2305801  | CYP4F11  | coding-synon                   | 0.1571                 | 17.78 | 2.48E-05 |
| 12   | rs2241280  | FGF6     | coding-synon                   | 20   | rs1042580  | THBD     | untranslated                   | 4.181                  | 17.15 | 3.45E-05 |
| 15   | rs874305   | IGF1R    | intron                         | 21   | rs12659    | SLC19A1  | coding-synon                   | 0.2029                 | 16.39 | 5.16E-05 |
| 16   | rs12922317 | TNFRSF17 | intron,TagSNP:TNFRSF17(BCMA)   | 19   | rs281432   | ICAM1    | intron                         | 3.102                  | 15.74 | 7.26E-05 |
| 16   | rs2239359  | FANCA    | coding-nonsynon                | 17   | rs1024611  | CCL2     | Promoter                       | 4.131                  | 15.3  | 9.17E-05 |
