# Supplementary material
Source: PubMed Central journal article supplement (PMC3601865)
Supplement: supp_blood-2008-02-140434_TableS11.pdf [file supp_blood-2008-02-140434_TableS11.pdf]

| SNP        | Treat ID name | Events (minor allele) |                 | Total N       |               | OR    | Lower 95%CI | Upper 95%CI | Weight(%) |
|------------|---------------|-----------------------|-----------------|---------------|---------------|-------|-------------|-------------|-----------|
|            |               | thal vitc group       | thal vitc group | control group | control group |       |             |             |           |
| rs12022378 | MyeloIX       | 46                    | 200             | 60            | 392           | 1.503 | 1.065       | 2.123       | 86.629    |
|            | Hovon50       | 4                     | 18              | 2             | 22            | 2.444 | 0.504       | 11.856      | 3.846     |
|            | E1A100        | 3                     | 12              | 13            | 58            | 1.115 | 0.375       | 3.320       | 9.524     |
|            | Total         | 53                    | 230             | 75            | 472           | 1.502 | 1.090       | 2.070       | 100.000   |
| rs1805414  | MyeloIX       | 50                    | 200             | 132           | 392           | 0.742 | 0.563       | 0.980       | 84.628    |
|            | Hovon50       | 4                     | 18              | 10            | 22            | 0.489 | 0.184       | 1.300       | 8.540     |
|            | E1A100        | 4                     | 12              | 21            | 58            | 0.921 | 0.386       | 2.198       | 6.832     |
|            | Total         | 58                    | 230             | 163           | 472           | 0.733 | 0.568       | 0.946       | 100.000   |
| rs2440     | MyeloIX       | 86                    | 200             | 137           | 392           | 1.404 | 0.991       | 1.990       | 91.029    |
|            | Hovon50       | 5                     | 18              | 4             | 22            | 1.731 | 0.388       | 7.725       | 4.486     |
|            | E1A100        | 5                     | 12              | 13            | 58            | 2.473 | 0.672       | 9.100       | 4.486     |
|            | Total         | 103                   | 200             | 157           | 392           | 1.589 | 1.128       | 2.240       | 81.133    |
| rs582537   | MyeloIX       | 3                     | 18              | 11            | 22            | 0.200 | 0.045       | 0.892       | 13.010    |
|            | Hovon50       | 7                     | 12              | 26            | 58            | 1.723 | 0.489       | 6.068       | 5.897     |
|            | E1A100        | 17                    | 12              | 26            | 58            | 1.723 | 0.489       | 6.068       | 5.897     |
|            | Total         | 113                   | 230             | 194           | 472           | 1.416 | 1.030       | 1.948       | 100.000   |
| rs1049216  | MyeloIX       | 38                    | 200             | 113           | 392           | 0.579 | 0.382       | 0.877       | 81.495    |
|            | Hovon50       | 5                     | 18              | 10            | 22            | 0.462 | 0.122       | 1.745       | 8.565     |
|            | E1A100        | 1                     | 12              | 24            | 58            | 0.129 | 0.016       | 1.065       | 9.940     |
|            | Total         | 44                    | 230             | 147           | 472           | 0.524 | 0.356       | 0.772       | 100.000   |
| rs299295   | MyeloIX       | 56                    | 200             | 78            | 392           | 1.586 | 1.054       | 2.326       | 84.399    |
|            | Hovon50       | 7                     | 18              | 6             | 22            | 1.697 | 0.447       | 6.439       | 7.340     |
|            | E1A100        | 2                     | 12              | 13            | 58            | 0.692 | 0.134       | 3.565       | 8.261     |
|            | Total         | 65                    | 230             | 97            | 472           | 1.503 | 1.041       | 2.171       | 100.000   |
| rs2267669  | MyeloIX       | 24                    | 200             | 84            | 392           | 0.500 | 0.306       | 0.816       | 87.543    |
|            | Hovon50       | 0                     | 18              | 4             | 22            | 0.111 | 0.006       | 2.214       | 6.948     |
|            | E1A100        | 2                     | 12              | 11            | 58            | 0.855 | 0.163       | 4.468       | 5.509     |
|            | Total         | 26.5                  | 231             | 99.5          | 473           | 0.493 | 0.310       | 0.782       | 100.000   |
| rs2302387  | MyeloIX       | 56                    | 200             | 56            | 392           | 0.557 | 0.315       | 0.987       | 86.733    |
|            | Hovon50       | 7                     | 18              | 3             | 22            | 4.030 | 0.861       | 18.856      | 4.134     |
|            | E1A100        | 0                     | 12              | 10            | 58            | 0.185 | 0.010       | 3.373       | 9.133     |
|            | Total         | 24.5                  | 231             | 69.5          | 473           | 0.667 | 0.404       | 1.101       | 100.000   |
| rs10249476 | MyeloIX       | 81                    | 200             | 122           | 392           | 1.506 | 1.057       | 2.147       | 88.549    |
|            | Hovon50       | 10                    | 18              | 9             | 22            | 1.806 | 0.512       | 6.363       | 6.499     |
|            | E1A100        | 4                     | 12              | 12            | 58            | 1.917 | 0.493       | 7.453       | 4.352     |
|            | Total         | 95                    | 230             | 143           | 472           | 1.546 | 1.111       | 2.152       | 100.000   |
| rs2070682  | MyeloIX       | 73                    | 200             | 179           | 392           | 0.684 | 0.482       | 0.970       | 88.889    |
|            | Hovon50       | 6                     | 18              | 8             | 22            | 0.875 | 0.236       | 3.242       | 5.556     |
|            | E1A100        | 5                     | 12              | 24            | 58            | 1.012 | 0.287       | 3.571       | 5.556     |
|            | Total         | 84                    | 230             | 211           | 472           | 0.713 | 0.514       | 0.988       | 100.000   |
| rs2410558  | MyeloIX       | 43                    | 200             | 113           | 392           | 0.676 | 0.452       | 1.011       | 83.534    |
|            | Hovon50       | 4                     | 18              | 11            | 22            | 0.286 | 0.071       | 1.148       | 10.732    |
|            | E1A100        | 3                     | 12              | 16            | 58            | 0.875 | 0.210       | 3.649       | 5.734     |
|            | Total         | 50                    | 230             | 140           | 472           | 0.646 | 0.445       | 0.937       | 100.000   |
| rs2161811  | MyeloIX       | 113                   | 200             | 174           | 392           | 1.627 | 1.154       | 2.294       | 87.488    |
|            | Hovon50       | 9                     | 18              | 8             | 22            | 1.750 | 0.492       | 6.220       | 6.158     |
|            | E1A100        | 7                     | 12              | 26            | 58            | 1.723 | 0.489       | 6.068       | 6.354     |
|            | Total         | 129                   | 230             | 208           | 472           | 1.641 | 1.191       | 2.261       | 100.000   |
| rs4253211  | MyeloIX       | 32                    | 200             | 39            | 392           | 1.724 | 1.043       | 2.849       | 89.982    |
|            | Hovon50       | 3                     | 18              | 1             | 22            | 4.200 | 0.397       | 44.403      | 3.049     |
|            | E1A100        | 2                     | 12              | 6             | 58            | 1.733 | 0.305       | 9.851       | 6.969     |
|            | Total         | 37                    | 230             | 46            | 472           | 1.800 | 1.125       | 2.881       | 100.000   |
| rs506504   | MyeloIX       | 13                    | 200             | 11            | 392           | 2.408 | 1.059       | 5.477       | 85.650    |
|            | Hovon50       | 2                     | 18              | 0             | 22            | 6.818 | 0.306       | 151.677     | 4.842     |
|            | E1A100        | 3                     | 12              | 3             | 58            | 6.111 | 1.063       | 35.119      | 9.508     |
|            | Total         | 18.5                  | 231             | 14.5          | 473           | 2.974 | 1.448       | 6.104       | 100.000   |
| rs7011     | MyeloIX       | 62                    | 200             | 89            | 392           | 1.530 | 1.044       | 2.240       | 88.243    |
|            | Hovon50       | 7                     | 18              | 6             | 22            | 1.697 | 0.447       | 6.439       | 7.018     |
|            | E1A100        | 6                     | 12              | 13            | 58            | 3.462 | 0.954       | 12.562      | 4.739     |
|            | Total         | 75                    | 230             | 108           | 472           | 1.633 | 1.148       | 2.322       | 100.000   |
| rs12922317 | MyeloIX       | 58                    | 200             | 155           | 392           | 0.625 | 0.433       | 0.901       | 86.254    |
|            | Hovon50       | 5                     | 18              | 9             | 22            | 0.556 | 0.146       | 2.114       | 6.786     |
|            | E1A100        | 2                     | 12              | 21            | 58            | 0.352 | 0.070       | 1.763       | 6.960     |
|            | Total         | 65                    | 230             | 185           | 472           | 0.601 | 0.426       | 0.848       | 100.000   |
| rs20579    | MyeloIX       | 13                    | 200             | 50            | 392           | 0.476 | 0.252       | 0.898       | 84.109    |
|            | Hovon50       | 1                     | 18              | 6             | 22            | 0.157 | 0.017       | 1.451       | 13.580    |
|            | E1A100        | 0                     | 12              | 2             | 58            | 0.504 | 0.041       | 20.019      | 2.311     |
|            | Total         | 14.5                  | 231             | 58.5          | 473           | 0.442 | 0.243       | 0.804       | 100.000   |
| rs4633     | MyeloIX       | 83                    | 200             | 204           | 392           | 0.654 | 0.463       | 0.922       | 88.988    |
|            | Hovon50       | 7                     | 18              | 9             | 22            | 0.919 | 0.257       | 3.283       | 5.463     |
|            | E1A100        | 4                     | 12              | 2             | 58            | 0.818 | 0.220       | 3.039       | 5.549     |
|            | Total         | 94                    | 230             | 235           | 472           | 0.677 | 0.491       | 0.935       | 100.000   |
| rs13815    | MyeloIX       | 52                    | 200             | 144           | 392           | 0.605 | 0.415       | 0.882       | 85.308    |
|            | Hovon50       | 4                     | 18              | 10            | 22            | 0.343 | 0.085       | 1.380       | 8.294     |
|            | E1A100        | 3                     | 12              | 21            | 58            | 0.587 | 0.143       | 2.411       | 6.398     |
|            | Total         | 59                    | 230             | 175           | 472           | 0.582 | 0.409       | 0.828       | 100.000   |
