# Supplementary material
Source: PubMed Central journal article supplement (PMC3601865)
Supplement: supp_blood-2008-02-140434_TableS12.pdf [file supp_blood-2008-02-140434_TableS12.pdf]

**Training Set**

|       | No DVT | DVT | Total |
|-------|--------|-----|-------|
| E1a00 | 25     | 6   | 31    |
| Hovan | 11     | 9   | 20    |
| MRC 9 | 129    | 69  | 198   |
| Total | 165    | 84  | 249   |

**Validation Set**

|       | No DVT | DVT | Total |
|-------|--------|-----|-------|
| E1a00 | 12     | 3   | 15    |
| Hovan | 5      | 4   | 9     |
| MRC 9 | 65     | 35  | 100   |
| Total | 82     | 42  | 124   |
