# Supplementary material
Source: PubMed Central journal article supplement (PMC3601865)
Supplement: supp_blood-2008-02-140434_TableS13.pdf [file supp_blood-2008-02-140434_TableS13.pdf]

| Training Set        |  | Clinical Classification |     |
|---------------------|--|-------------------------|-----|
| Tree Classification |  | No DVT                  | DVT |
|                     |  | No DVT                  | 140 |
| DVT                 |  | 13                      | 45  |
| NA                  |  | 12                      | 5   |

| Validation Set      |  | Clinical Classification |     |
|---------------------|--|-------------------------|-----|
| Tree Classification |  | No DVT                  | DVT |
|                     |  | No DVT                  | 50  |
| DVT                 |  | 26                      | 6   |
| NA                  |  | 6                       | 4   |
